# Supplementary material for: Both Feline Coronavirus Serotypes 1 and 2 Infected Domestic Cats Develop Cross-Reactive Antibodies to SARS-CoV-2 Receptor Binding Domain: Its Implication to Pan-CoV Vaccine Development
Source: MDPI journal article supplement (doi:10.3390/v15040914), 2023-03-31
Supplement: s1 [file s1]

## Supplemental Materials

**Figure S1. The UF RBD and MassBiologic (MB) RBD sequences.** The information on the additional tags is shown with the complete RBD sequence (A). The MB-RBD is longer by 12 aa on the carboxyl-end. This 12 aa sequence is highly conserved among many human and animal coronaviruses, including FCoV and CCoV. The SCoV2 RBD has two strongly predicted O-glycosylation sites (bolded blue threonine **T** or serine **S**) and two N-glycosylation sites with low prediction (bold red asparagine **N**) on the amino-end on both UF and MB RBDs. MB-RBD has an additional O-glycosylation site on the first two aa residues (**S** and **T**) of the 12 aa addition on the carboxyl-end. The glycosylation prediction was based on a NetNGlyc 1.0 Server (<https://services.healthtech.dtu.dk/service.php?NetNGlyc-1.0>) for an N-glycosylation and NetOGlyc 4.1 Server (<https://services.healthtech.dtu.dk/service.php?NetMHCpan-4.1>) for O-glycosylation. Next, the sera from the same time-points as Figure 1E for the three toms were tested for anti-BSA antibodies before the assay for Figures 1D/1E (B). Serum from SPF HOE serves as the negative control and serum from SPF cat DU1, which was vaccinated with FIV vaccine with residual BSA, serves as the anti-BSA Ab positive control.

**Figure S2. The comparison of the aa residue numbers and aa sequence identity/similarity of the SCoV2 Wuhan (NC045512.1), FCoV1 UCD-1, and FCoV2 79-1146 (DQ010921.1) structural proteins.** The aa residue numbers are provided to estimate the MW of these proteins without glycosylation and to determine the aa sequence identity and similarity between the viruses (A). FCoV1 UCD-1 S (AB088222.1), NC (BAC1157.1) and M (BAC1156.1) were available but its Env sequence was unavailable and, therefore, FCoV1 Dutch Cat1 Env (KX722530.1) was used in its place. The total aa identity or similarity value divided by the total aa residues including gaps x100 provides the percentage. The two values for S1 and S2 are provided, based on where the SCoV2 S is processed into S1 and S2 at the S1/S2 cleavage site and where the FCoV1 S and FCoV2 S are processed into S1 and S2 [47,48]. Under the % aa identity and % aa similarity for S1 and S2 proteins, the first value is for SCoV2, followed by the value for FCoV1 in row-1 and FCoV2 in row-2. The first value is for FCoV1, followed by the value for FCoV2 in row-3. The MW without glycan (B) is determined by using Peptide Analyzing Tool (<https://www.thermofisher.com/us/en/home/life-science/protein-biology/peptides-proteins/custom-peptide-synthesis-services/peptide-analyzing-tool.html>). The predicted N- and O-glycosylation numbers are determined by NetNGlyc 1.0 server and NetOGlyc 4.1 Server, respectively (B), and their network addresses are first described in Figure S1 legend.

**Figure S3. Sequence alignment of SCoV2 Wuhan and FCoV2 79-1146 spike glycoproteins.** Clustal Omega 1.2.1 of JustBio Server (<https://justbio.com/>) was used for all sequence alignment analyses (A). Signal peptides for all sequences were determined by SignalP – 6.0 server of DTU Health Tech (<https://services.healthtech.dtu.dk/service.php?SignalP>). The abbreviations used include: amino-terminal domain (NTD), receptor binding domain (RBD), receptor binding motif (RBM), carboxyl-terminal domain (CTD), spike glycoprotein-1 (S1), and spike glycoprotein-2 (S2). RBM (underlined bold) has the aa residues that contact the cell receptor (e.g., species-specific ACE2 and APN). S1/S2 cleavage sites are found with cleavage motif (bold red) at the usual site for SCoV2, but the cleavage motif at the usual site is not found for FCoV2 [47,48]. The S1/S2 cleavage site for FCoV2 and CCoV2 is reported to be amino-end adjacent to the fusion peptide, which is the S2' cleavage site for other strains. The FCoV2 79-1146 sequence is shown in magenta. Identical and similar aa residues are shown with an asterisk (\*) for complete identity, strong similarity with a colon (:), and modest similarity with a single dot (.). The gaps are shown with a dash (-). The summary table (B) shows the total number of aa with gaps, number of aa with identity, number of aa with similarity, % aa identity, and % aa similarity. Two values for CTD, S1, and S2 are shown in the summary table (B), due to the major difference in the location of the S1/S2 cleavage site. In addition, the values for the proposed RBD sequence are also shown. The bolded % aa sequence similarities are the two lowest values and the two highest values.

**Figure S4. Sequence alignment of SCoV2 Wuhan and FCoV2 UCD1 spike glycoproteins.** The sequences were aligned using the Clustal Omega 1.2.1 of JustBio Server (A), as described in Figure S2. The aa identity, similarity, gap, abbreviations, cleavage site, and table summary format are the same as those described in Figure S2. The FCoV1 UCD-1 sequence is shown in magenta. Two values for CTD, S1, and S2 are shown in the summary table (B), due to the major difference in the location of the S1/S2

cleavage site for these viruses. In addition, the values for the proposed RBD sequence are also shown. The bolded % aa sequence similarities are the two lowest values and the two highest values.

**Figure S5. Anti-CoV analyses of group-housed laboratory and pet cats.** The analyses were performed using the FCoV2-WV and SCoV2 RBD ELISA (A) and the immunoblot strips (B,C) with SCoV2 UF-RBD (B1,C2 last row), proposed FCoV2 RBD (B2,C2 second row), FCoV2-WV (B3,C1), and the proposed FCoV1 RBD (B4,C2 first row). The eight group-housed laboratory cats (A,B) were unrelated to our UGA queens and UF toms, but the animal vendor was the same as the UGA queens and had different breeding lineages. Additionally, three group-housed pet cats from a household of five cats were similarly tested as a preliminary study (C1-C4), to determine whether FCoV-infected pet cats develop cross-reactive antibodies to SCoV2 RBD. Pet cat sera KY1 and KY2 are from the same cat, collected first (KY1) at the same time as the other two cats (KM1 and KN1), and again 2.5 months later (KY2). The owner indicated that she has not been infected with SCoV2 and had no signs of COVID-19 (IRB202002902). However, her pet cats are allowed to roam outdoors and, therefore, there is a remote possibility that they have been exposed to SCoV2-infected cat(s) outdoors. We have not tested her cats by SCoV2 RT-PCR or SCoV2 NAb assay. The serum from UGAQ4 was the FCoV1<sup>+</sup> control for FCoV2-WV (A,B3,C1) and FCoV1 RBD (B4,C2 first row) ELISA or immunoblot. The plasma or serum from cats J2a and UGA4.4 were FCoV2<sup>+</sup> (B2,C2 second row) and SCoV2<sup>+</sup> (B1,C2 last row) controls, respectively. The serum from cat UGAQ4 and UGA1.4 also served as weak positive controls for FCoV1 and FCoV2 RBD immunoblots, respectively, (C2 rows 1 & 2, B2 row 1) whereas serum from SPF cats HOF and HOE served as a negative control from all immunoblots and ELISA, respectively. The results for SCoV2 RBD (B1, lower panel; C2, third panel) are shown below each immunoblot strip, with the final result of either a positive (+) or negative (-). Those summary results with a subscript “a”, as shown as (+<sup>a</sup>) or (-<sup>a</sup>), are supported by results performed at 1:25 dilution (data not shown). All immunoblot photographs were adjusted to 10% brightness and 5% contrast for consistency.

**Figure S6. Sequence alignment of SCoV2 Wuhan and SCoV1 Tor2 spike glycoproteins.** The sequences were aligned using the Clustal Omega 1.2.1 of JustBio Server as described in Figure S2 (A). The aa identity, similarity, gap, abbreviations, cleavage site, and table summary format are the same as those described in Figure S2. The RBD for each virus is shown in bold blue aa residues and the underlined section represents the RBM (A). These two sequences are highly conserved, with a minimal number of gaps observed predominantly in NTD of S1 glycoprotein. The demarcation sites of the NTD, RBD, and CTD are identical between these viruses. The summary table (B) shows an additional column for the whole spike sequence. The bolded % aa sequence similarities are the one lowest value and the one highest value.

**Figure S7. The SCoV2 UF2-RBD sequence with aa extensions.** The aa sequence extensions in blue aa residues were selected based on the sequence with aa conservation between SCoV2 and FCoV2 (Figure S3) and SCoV2 Wuhan and SCoV1 Tor2 (Figure S6) (A). The extensions were also based on the number of SCoV2-specific cytotoxic T lymphocyte (CTL) and T-helper (T<sub>H</sub>) epitopes increased by the aa extensions as shown in Table S1. Additionally, the aa residue number of UF2-RBD (269 aa) was increased to the residue number. This is similar to our FCoV2 RBD (268 aa) that blocked *in vitro* FCoV2 infection more potently than the short SCoV2 UF-RBD. Our goal is to increase the CTL epitopes, which will eradicate the SCoV2 infected cells, without increasing the T<sub>H</sub> epitopes, which has the potential to elevate the inflammatory responses. In our preliminary study (B), the sera from COVID-19 vaccinated humans (Y3, Y6) with no prior SCoV2 exposure were tested with either SCoV2 UF2-RBD or a UF-RBD immunoblot strip. Subject Y3 received three vaccinations with Pfizer S mRNA vaccine. Subject HY6 received two vaccinations with Astra-Zeneca ChAsOX1-S recombinant vaccine, followed by vaccination with the Pfizer S mRNA vaccine. The serum collected in 2017 from Y3 was used as a negative human control. The sera from SCoV2-inoculated cat UGA4.1 and SPF cat HOF also served as positive and negative cat controls, respectively.

**Figure S8. Multi-sequence alignment of 10 CCoV2 spike versus four FCoV2 spike sequences.** The sequences were aligned using the Clustal Omega 1.2.1 of JustBio Server (A) as described in Figure S2. The aa identity, similarity, gap, abbreviations, cleavage site, and table summary format are the same as those described in Figure S2. The FCoV2 79-1146 sequence is shown in magenta. The RBD for FCoV2 79-1146 is shown with yellow highlight. Two values for CTD, S1, and S2 are shown in the summary table

(B), due to the slight difference in the S1/S2 cleavage site motif among the CCoV2 and FCoV2 strains and are depicted with the cleavage motif. The bolded % aa sequence similarities are the one lowest value and the two highest values.

**Figure S9. Multi-sequence alignment of two CCoV1 spike versus 10 FCoV1 spike sequences.** The sequences were aligned using the Clustal Omega 1.2.1 of JustBio Server (A), as described in Figure S2. The aa identity, similarity, gap, abbreviations, cleavage site, and table summary format are the same as those described in Figure S2. The FCoV1 UCD-1 sequence is shown in magenta. The RBD for FCoV1 UCD-1 is shown with yellow highlight. Two values for CTD, S1, and S2 are shown in the summary table (B), due to the two aa residues difference in the S1/S2 cleavage site of the CCoV1 and FCoV1 and are designated by the virus. The bolded % aa sequence similarities are the one lowest value and the two highest values.

**Figure S10. Titration of sera from the last collection date from all toms and three UGA queens.** The last sera collected from the toms (5HQ, HOG, HOJ) were titrated at dilutions of 1:50, 1:100, and 1:1000 using SCoV2 RBD immunoblot strips (A1) and FCoV1 RBD immunoblot strips (A2). Toms 5HQ, HOG, and HOJ are the abbreviation of 5HQT1, HOGT3, and HOJT2. The last sera collected from UGA queens UGAQ2, UGAQ3, and UGAQ4 were also titrated at the same dilutions as the toms using the SCoV2 RBD immunoblot strips (B1) and FCoV1 RBD strips (B2). One set of immunoblot batch at 1:50 was different from those of 1:100 and 1:1000, due to each batch containing not more than 22 strips. However, the SCoV2 RBD and FCoV1 RBD immunoblot strip batches used at 1:50 dilution were the same between the Toms and the queens. The serum from UGA queen UGAQ1 was not included in this analysis, due to her abnormal antibody (Ab) profile, most likely caused by her illness. The last serum from UGAQ3 was negative for Abs to both SCoV2 and FCoV1 RBDs at all dilutions. This was expected because her serum at post-8 mo upon UF arrival had detectable and extremely weak reactivities to FCoV1 RBD at 1:25 and 1:50 dilutions, respectively, but no reactivity to SCoV2 RBD at either dilutions (Figure 3D). The sera from SCoV2-infected cat UGA4.4, FCoV1-infected cat J1A3 (serum from 2 mo post-FCoV1 UK-2 inoculation), and SPF cat HOF served as SCoV2 positive control, FCoV1 positive control, and negative cat control, respectively. All immunoblot photographs were adjusted for consistency to 10% brightness and 5% contrast. SCoV2 control cat UGA4.4 was euthanized at two weeks post-SCoV2 inoculation (1-mL intranasal inoculation with SCoV2 Wuhan at  $10^6$  TCID<sub>50</sub>) and may not have had enough time or inoculation dose to develop strong Abs to SCoV2. In contrast, FCoV1 control J1A3, with 1-mL of oral/intranasal inoculation with FCoV1 UK-2 at  $10^5$  TCID<sub>50</sub>, developed strong Ab titer to FCoV1 RBD, even at 1:1000 dilution. It is also possible that the immune system of the FCoV1-control J1A3 was more responsive than the SCoV2-control UGA4.4 to their respective virus inoculation.

The virus antigen amounts of SCoV2 and FCoV1 RBDs on the immunoblot strips were identical (5 µg per strip). Hence, the titration of the last sera from the toms shows loss of reactivities to SCoV2 RBD, starting at 1:100 dilution, but not to FCoV1 RBD. The last sera from all toms maintained Ab titers to FCoV1 RBD, even at 1:1000 dilution. The same sera from these toms titrated on FCoV2-WV show strong reactivity to NC, even at 1:1000 dilution by all three toms (Figure 3E). The last sera from two of the three queens (UGAQ2, UGAQ4) had strong reactivity to FCoV1 RBD at all dilutions, whereas, same two queens had no Ab titer to SCoV2 RBD, even at the highest concentration of 1:50 dilution. This suggests that cross-reacting Abs to SCoV2 RBD are lost before Abs to FCoV1 RBD. Our results, shown in this figure, indicate that both the toms and UGA queens were infected with FCoV1, instead of SCoV2.

**Figure S11. Another pet cat household with FCoV1-infected cats.** An internal medicine veterinarian from the UF CVM hospital contacted the Laboratories of Comparative Immunology & Virology for Companion Animals (LCIV-CA) Program for a consultation. They requested testing of a 7-month-old, female pet cat (AP), suspected of FIPV infection with a severe lung lesion. Her sibling from the same litter of three died from FIPV infection, and her brother is still alive in the same household of three indoor cats. The third cat in this household is unrelated to the patient. The lung lesion biopsy was negative by FCoV RT-PCR, and her serum was negative by FCoV ELISA. The LCIV-CA immediately performed, free of charge, immunoblot analyses with the following antigens: FCoV1 RBD, FCoV2 RBD, and SCoV2 RBD (A), as well as FCoV2-WV and feline immunodeficiency virus (FIV)-WV (B). The FCoV2-WV immunoblot bands show a full-length spike (S), spike-2 (S2), nucleocapsid (NC) and membrane (M) glycoproteins/proteins (B). The feline immunodeficiency virus (FIV) immunoblot bands show surface

envelope (SU), transmembrane envelope (TM), capsid p24 (CA), and matrix (MA) glycoproteins/proteins. The S and S2 bands of the FCoV2-WV immunoblot strips are shown with a white arrow, and the remaining key FCoV protein bands are shown with a white arrow-head. Similarly, the SU and TM bands of FIV-WV immunoblot strips are shown with a white arrow and other key bands are shown with an arrow-head. The BSA band at 67-70 kDa is shown with a small “b” alone or next to the bracket. LCIV-CA provided Figures S11A and S11B to the veterinarian and the owner. The owners of this household were negative for SCoV2 infection. The patient’s code (AP) is in red, and her summary results on the bottom of the strips are also in red. The immunoblot photographs were adjusted for consistency to 10% brightness and 5% contrast.

The owner wanted to purchase anti-CoV polymerase inhibitor, Remdesivir, from China to treat cat AP [91]. FCoVs and their mutated FIPVs are highly contagious in a multi-cat household. Therefore, LCIV-CA suggested to the owner that she should make sure the remaining two cats are FCoV negative and, if positive, they should be treated at the same time. The patient’s brother (HP) and her 2-year-old male friend (MP) were bled 1.5 months later at the UF CVM Hospital. The original serum from AP, stored in refrigeration, was also included in the testing of the household cats. All of the immunoblot strips were different batches from those used in the initial clinical tests in Figure S11, to demonstrate reproducibility in our analyses. These immunoblot photographs are shown without any adjustments. All three cats were positive for Abs to FCoV1 RBD (C1) and NC protein (43 kDa band) (D). Patient AP and her brother HP were positive for Abs to SCoV2 RBD (C3), but negative for Abs to FCoV2 (C2). Cat MP had extremely weak bands for S, S2, and M glycoproteins. Both AP and HP had no S2 Abs, which was somewhat of a rare observation. The only other cat, G-3, (Figure S5B3, first bleeding) also had no S2 Abs, but developed S2 Abs by the second bleeding. In summary, all three pet cats were exposed to FCoV1 infection and not to FCoV2 infection. Patient AP and her brother HP had cross-reacting Abs to SCoV2 RBD, whereas cat MP was negative for SCoV2 RBD Abs, suggesting that MP may be clearing FCoV1 infection based on the results from Figure S10.

**Table S1. CD8<sup>+</sup> CTL and CD4<sup>+</sup> T<sub>H</sub> Epitopes on SCoV2 UF-RBD and UF2-RBD.**



Figure S1

**A** MB-RBD (MassBiologics Wuhan RBD residue 319 to 541) glycoprotein kindly provided by MassBiologics with attached Tags: c-Myc Peptide; 6xHis Tag

UF-RBD from a plasmid with Wuhan RBD residue 319-529 sequence (MN975262.1) with attached Tags: HRV 3C Cleavage Site; 8xHis Tag; Streptavidin-Binding Peptide (SBP) Tag

|        |                                                                               |
|--------|-------------------------------------------------------------------------------|
| MB-RBD | 319-RVQPTESIVRFPNITNLCPFGEVFNATRFASVYAWNRRKRISNCVADYSVLYNSASFSTFK-378         |
| UF-RBD | 319-RVQPTESIVRFPNITNLCPFGEVFNATRFASVYAWNRRKRISNCVADYSVLYNSASFSTFK-378         |
|        | *****                                                                         |
| MB-RBD | 379-CYGVSPTKLNDLCFTNVYADSFVIRGDEVQRQIAPGQTGKIADYNYKLPDDFTGCVIAWNS-438         |
| UF-RBD | 379-CYGVSPTKLNDLCFTNVYADSFVIRGDEVQRQIAPGQTGKIADYNYKLPDDFTGCVIAWNS-438         |
|        | *****                                                                         |
| MB-RBD | 439-NNLDSKVGGNYNLYRLFRKSNLKPFERDISTEIQAGSTPCNGVEGFNCYFPLQSYGFQ-498            |
| UF-RBD | 439-NNLDSKVGGNYNLYRLFRKSNLKPFERDISTEIQAGSTPCNGVEGFNCYFPLQSYGFQ-498            |
|        | *****                                                                         |
| MB-RBD | 499-PTNGVGYPYRVVLSFELLHAPATVCGPKKSTNLVKNKCVNF – c-Myc Peptide - 6xHis Tag     |
| UF-RBD | 499-PTNGVGYPYRVVLSFELLHAPATVCGPKK- HRV 3C Cleavage Site - 8xHis Tag - SBP Tag |
|        | *****                                                                         |

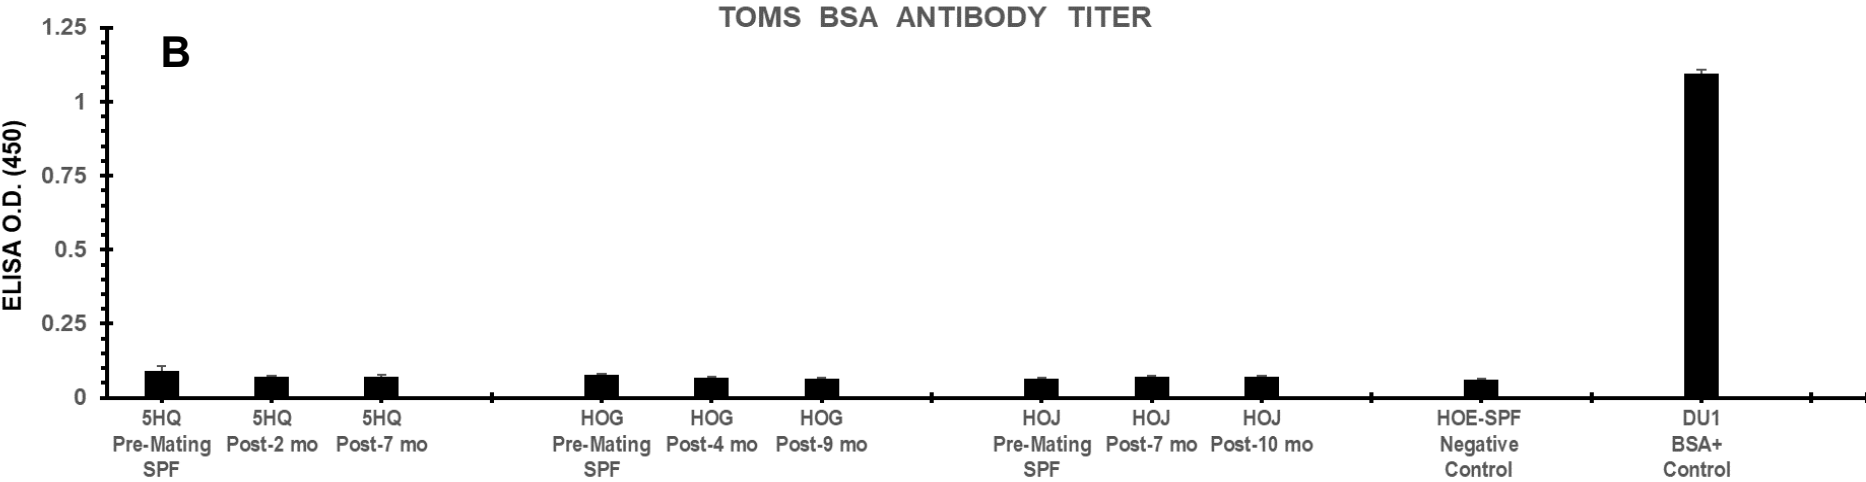

Figure S2

A Summary of SCoV2 versus FCoV1/FCoV2 Structural Proteins

| SCoV2 vs. FCoV1<br>FCoV1 vs. FCoV2 | Structural Protein * | Number of AA  | AA Identity (%) | AA Similarity (%) |
|------------------------------------|----------------------|---------------|-----------------|-------------------|
| SCoV2 vs. FCoV1                    | Spike (S1+S2)        | 1273 vs. 1457 | 20.7%           | 50.1%             |
| SCoV2 vs. FCoV2                    | Spike (S1+S2)        | 1273 vs. 1452 | 22.0%           | 50.4%             |
| FCoV1 vs. FCoV2                    | Spike (S1+S2)        | 1457 vs. 1452 | 43.7%           | 72.6%             |
| SCoV2 vs. FCoV1                    | S1                   | 685 vs. 790   | 12.9% / 13.0%   | 39.4% / 40.0%     |
| SCoV2 vs. FCoV2                    | S1                   | 685 vs. 959   | 14.5% / 16.3%   | 41.4% / 43.4%     |
| FCoV1 vs. FCoV2                    | S1                   | 790 vs. 959   | 29.5% / 31.6%   | 62.9% / 64.5%     |
| SCoV2 vs. FCoV1                    | S2                   | 588 vs. 667   | 31.6% / 30.1%   | 65.1% / 62.2%     |
| SCoV2 vs. FCoV2                    | S2                   | 588 vs. 493   | 32.0% / 33.5%   | 62.2% / 64.5%     |
| FCoV1 vs. FCoV2                    | S2                   | 667 vs. 493   | 60.6% / 68.7%   | 84.0% / 89.9%     |
|                                    |                      |               |                 |                   |
| SCoV2 vs. FCoV1                    | Env                  | 75 vs. 82     | 25.6%           | 68.3%             |
| SCoV2 vs. FCoV2                    | Env                  | 75 vs. 82     | 23.2%           | 67.1%             |
| FCoV1 vs. FCoV2                    | Env                  | 82 vs. 82     | 96.3%           | 97.6%             |
|                                    |                      |               |                 |                   |
| SCoV2 vs. FCoV1                    | NC                   | 419 vs. 377   | 25.3%           | 59.2%             |
| SCoV2 vs. FCoV2                    | NC                   | 419 vs. 377   | 25.7%           | 58.0%             |
| FCoV1 vs. FCoV2                    | NC                   | 377 vs. 377   | 92.8%           | 97.6%             |
|                                    |                      |               |                 |                   |
| SCoV2 vs. FCoV1                    | M                    | 222 vs. 262   | 26.3%           | 55.0%             |
| SCoV2 vs. FCoV2                    | M                    | 222 vs. 262   | 25.6%           | 54.2%             |
| FCoV1 vs. FCoV2                    | M                    | 262 vs. 262   | 95.4%           | 98.5%             |

\* Spike 1 (S1), Spike 2 (S2), Envelope (Env), Nucleocapsid (NC) and Membrane (M) proteins.

B Structural Proteins Based on Total AA Number and the Predicted N- and O-Glycosylation(s)

| Structural Protein | FCoV1 (Da)*    | FCoV1 Glycan N / O† | FCoV2 (Da)*    | FCoV2 Glycan N / O† |
|--------------------|----------------|---------------------|----------------|---------------------|
| <b>S (S1+S2)</b>   | <b>163,727</b> | <b>3 / 3</b>        | <b>160,473</b> | <b>4 / 1</b>        |
| <b>S1</b>          | <b>89,666</b>  | <b>3 / 1</b>        | <b>106,185</b> | <b>4 / 1</b>        |
| <b>S2</b>          | <b>74,080</b>  | <b>1 / 2</b>        | <b>54,307‡</b> | <b>1 / 0</b>        |
| <b>Env</b>         | <b>9,379</b>   | <b>0 / 0</b>        | <b>9,371</b>   | <b>0 / 0</b>        |
| <b>NC</b>          | <b>42,663</b>  | <b>0 / 0</b>        | <b>42,703</b>  | <b>0 / 4</b>        |
| <b>M</b>           | <b>29,920</b>  | <b>1 / 0</b>        | <b>29,832</b>  | <b>1 / 0</b>        |

\* The MW of FCoV is determined by the total aa residue number using the Peptide Analyzing Tool server.

† The number of N-glycosylation (N) with high or medium potential and O-glycosylation (O) with strong potential are shown as (N / O).

‡ The predicted FCoV2 S2 shown in Fig. 2B matches the MW of FCoV1 S2 with glycan(s). Hence, the predicted FCoV2 S1/S2 cleavage site may be more closer to that of FCoV1, and FCoV2 S2 with glycan may be closer in size to the FCoV1 S2 with glycan(s).

# A

YP009724390.1\_SCoV2\_Wuhan  
AA32596.1\_FCoV2\_WSU79-1146

**Signal Peptide** → **NTD / S1**

**MFVF**-----**LVLLPLVSS**QCQVNLTRT-----QLPP-----AYTNSFTRGVVY  
**MIVLV**TCLLLLCSYHTVLST**TNNECIQVNV**TQLAGNENLIRDFLSNFKEEGSSVVVGGYY  
\*::: .: \* . . . \*::: .: \* \* . . \*  
↓ **NTD**

PDKVFRRSSVLHSTQDLFLPFFSNVTFWFA-IH-VSGTNGTKRFDNPVLPFNDGV-----  
**PTEVWYNCSR**TARTTAF-QYFNNIHAFYFVMEAMENSTGNAR-GKPLLHVHGEFVSVII  
\*::: .: \* :\*: \*: :. :. :\*. \* :\*: . \*

--YFASTEKSNII-----RGWIFGTTLDSKTQSL--LIVNNATNV  
**SAYRDDVQQR**PLLKHGLVCITKNRHINYEQFTSNQWNSTCTGADRKIPFSVPTDNGTKI  
\* .::: : : . \* \* . . : : :\*: \*: :

VIKVFCEQFCNDPFLGVYYH-KNNKSWMESEFRVYSSANNCTFEYVSQPFMLDLEG----  
**YGLEW**NDFVTAYISGRSYHLNINTNWFNNVTLTLYSRSSATATWEYSAAAYAQGVSNFTYY  
: : \* : \* \*\* : \* .\*: .: \*\* : . . : :

KQGNFKNLREFV---FKNIDGYFKIYSKHTPINLVRDLPQGFSALEPLVDLP-IGINIT  
**KLNN**TNGLKTYELCEDYEHCTGYATNVFAP---TSGGYIPDGFSSFNNWFLLTNSSTFVSG  
\* \* : \* : : :. \* . . :\*: \*\* : : :

RFQTLALHRSYLTPG---DSSSGWTA-----GAAAYVGYL---Q-  
**RFVT**NQPLLINCLWPVPSFGVAAQEFCEFGAQFSQCNGVSLNNTVDVIRFNLNFTADVQS  
\*\* \* . \* \* :. : . : : : \*

↓ **NTD** ← **RBD / S1**

-PRTFLLKYNENGTITDAVDCALDPLSETKCTLKSFSTVEKGIYQTSNFRVQPTESIVREF  
**GMGATV**FSLNTTGGVILEISCYSDTVSESSSY-GEIPFGITDGPY-----CYVLY-  
: :. \* . \* : : \* \* :\*: .: \* \* : : . \* :

↓ **NTD**

**NIT**NLCPFGEVFNATRFASVYAWNKRIS-----NCVA-----  
**NGTALKYL**GTLPSPVKEIAISKWGHFYINGYNFFSTFPIGICISFNLTGTGVS GAFWTIAYT  
\* \* \* : \* : :. : : \* : \* . \*::  
↓ **Proposed RBD / S1**

-----DYSVLYNASASFSTFKCYGVSP-----KLNLCFTN--VYADS  
**SYTEALVQ**VENTAIKNVTYCNSHINNIKCSQLTANLNGGFYPVASSEVGFVNKSVLLPS  
. \* \* .: :. :\*: :. . :. : \* . \* \*

FVIRGDEVQRQIAPGQTGKIADYNYKLPDDFTGCVIAW**NSNNLDSKVG**GNYNLYRLFRKS  
**FFTYTA--VNIT**IDLGMKLSGYGQPIASTLSNITLPMQDNN**TDVY**CIRS--NQFSVYVHS  
\* . :\*: \* : :. :. :. :. :\*: \*

**NLK-----PFERDI-----STEIYQAGSTPC-----N--GVEGFNCYFP**  
**TCKSSLWDNI**FNQDCTDVLEATAVIKTGTCPFSFDKLNLYLTNKFCLSLSPVGANCKED  
. \* :\*: : : : \* . \* \* \*

↓ **RBD** ← **CTD / S1**

**LQSYG**FQPTNGVGYPYRVVLSFELLHAPATVCGPKKSTNLVKNKCVNFNFNGLTGTGV  
**VAARTR**-NEQVVRSLYVIYEEDNIVGVPSDNSGLHDLVLHLD**SCTD**YNIYGR**TGVGI**  
: : .: \* . \* : : :. : \* :. : \* : \* : \* : \*

↓ **Proposed RBD** ← **CTD**

LTESNKKFLPFQQFGRDIADTTDAVRDPQTLEILDITPCSFGGVSVITPGTNTSNQVAVL  
**IRRT**NSTLLSGLYTSLSG-DLLGFKNVSDGVIYSVTPCDVSVQAVIDGAIVGAMTS--  
: .\*: . \* : . . :. : \* :\*: . : :

YQDVNCTEVPVAIHADQLTPTWRVYSTGSNVFQTRAGCLIGAEHVNNSECDIPIG---A  
---INSE---LLGLTHWTTT**PNFY**YSIYNYT**SERT**RGTAI---DSNDVDCEPVITYSNI  
: \* : :. : \* :. : \* \* . : \* \* . \* : : \*

↓ **CTD** ← **S1/S2** →

GICASYQTQTN**SPRRAR**SVASQSIAYTMSLGAENSVAYSNNNSIAIPTNFTISVTTEILP  
**GVCKN**-----GALVFINVTHSDGDVQPISTGNVTIPTNFTISVQVEYMQ  
\* \* : : : : : \* : : : : : \* : : : : \*

VSMTKTSVDCTMYICGDSTEC SNLLLQYGSFCTQLNRALTGIAVEQDKNTQE-VF-----  
 VYTPVPSIDCARYVCNGNPRCNKLLTQYVSACQTIEQALAMGARLENMEVDSMLFVSENA  
 \* \* \* \* \* \* \* \* \* \* \* \* \* \* \* \* \* \* \* \* \* \* \* \* \* \* \* \* \* \*

YP009724390.1\_SCoV2\_Wuhan  
AA32596.1\_FCoV2\_WSU79-1146

[illegible]

YP009724390.1\_SCoV2\_Wuhan  
 AAY32596.1\_FCoV2\_WSU79-1146

TLADAGFI-KQYGDCLGDIAARDLICAQKFNGLTVLPPLLTDEMQYTSALLAGTITSG  
 VTSGLGTVDEDYKRCTGGYDIADLVCAQYNGIMVLPGVANADKMTMYTASLAGGI-TLG  
 . : \* : : \* \* \* \* \* : : : \* \* : : : \* \* \*

YP009724390.1\_SCoV2\_Wuhan  
 AAY32596.1\_FCoV2\_WSU79-1146

WTFTGAGAALQIPFAMQMAYFRNGIGVTVQNVLNYENQKLIANQFNSAIGKIQDSL-----  
A--LGGGAVAIPFAVAVQARLNLYVALQTDVLNKNQQIILANAFNQAGNIQTAFGKVNDAI  
\* \* : \*\*\*\*\* : \*.\* : : \*\* \*\*:\*\*\* :\*\* \*\* \*\*.\* :

YP009724390.1\_SCoV2\_Wuhan  
 AAY32596.1\_FCoV2\_WSU79-1146

-----SSTASALGKLQDVVNQNAQALNTLVKQLSSNFGAISSVLNDILSRLDKVEAEV  
HQT SQGLATVAKALAKVQDVVNTQGQALSHLTVQLQNNFQAISSSIDY NRLDELSADA  
: \* \* \* \* : \* \* \* \* \* : \* \* \* \* \* : \* \* \* \* \* : \* \* \* \* \* : \* \* \* \* \* : \* \* \* \* \* : \* \* \* \* \* : \* \* \* \* \*

YP009724390.1\_SCoV2\_Wuhan  
 AAY32596.1\_FCoV2\_WSU79-1146

QIDRLITGRLQSLQTIVTQQQLIRAAEIRASANLAATKMSECVLGQSKRVDFCGKGHYHLS  
QVDRLLTGRLTALNAFVSQTLTRQAEVRASRQLAKDKVNECVRSQSQRFGFCGNTHLFS  
\*.\*\*\*\*\* .\*:.\*.\* \* \* \*.\*\*\*\*\* :\*\* \*:\*\*\* \*\*:\*. \*\*\*\*.\* \*\*.\*

YP009724390.1\_SCoV2\_Wuhan  
 AAY32596.1\_FCoV2\_WSU79-1146

FPQSAPHG VVFLHVTYVPAQEKNFTTAPAICHDGKA-HFP-----REGV FVSNGTHW FV  
LANAAPNGMIFFHTVLLPTAYETVTAWSGICASDGDRTFGLVVKDVQLTLFRNLDDKFYL  
: : : \* \* : : \* : : \* : : \* : : \* : : \* : : \* : : \* : : \*

YP009724390.1\_SCoV2\_Wuhan  
 AAY32596.1\_FCoV2\_WSU79-1146

**Stem Helix (SH)**

**SH Core**

TQRNFYEPQIIITDNTFVSGNCDVVIGIVNNTVYDPLQPE---LDSFKEELDKYFKNHT  
TPRTMYQPVRVATSSDFVQIEGCDVLVFVNATVIDLPSTIPDYIDINQTVDILENYEFPNW  
\* \* \* \* \* : \* \* \* \* : \* \* \* \* : \* \* \* \* : \* \* \* \* : \*

YP009724390.1\_SCoV2\_Wuhan  
AA32596.1\_FCoV2\_WSU79-1146

SPVDVLGDISGINASVVNIQKEI-----DRLNEVAKNLNESLIDLQELGKY  
VPEFTLDIF---NATYLNLTGEIDDLEFRSEKLHNTTVELAILIDNINNTLVNLEWLNRI  
\* : \* : \*\* : \* : \*\* : \* : \* : \* : \* : \* : \*

YP009724390.1\_SCoV2\_Wuhan  
 AAY32596.1\_FCoV2\_WSU79-1146

EQYIKWPWYIWLGFIAGLIAIVMVTIMLCM-TSCCCLK--GCCSCGSCCKFDEDDSE  
ETVYKWPWYVWLLIGLVVFC-IPLLLFCCFSTGCCGIGCLGSCCH-SICSRQFENYE  
\* \* \* \* \* . . . . . \* \* \* \* \* \*\* \* . . . \*

YP009724390.1\_SCoV2\_Wuhan  
AA32596.1\_FCoV2\_WSU79-1146

PVLKGVKLHYT  
PI-EKVHVH--  
\* : : \* : : \*

**B**

### Summary of Amino Acid (AA) Sequence Identity and Similarity between SCoV2 and FCoV2

|                           | NTD   | RBD          | RBD<br>(Proposed) | CTD<br>(SCoV2) | CTD<br>(FCoV2) | S1<br>(SCoV2) | S1<br>(FCoV2) | S2<br>(SCoV2) | S2<br>(FCoV2) |
|---------------------------|-------|--------------|-------------------|----------------|----------------|---------------|---------------|---------------|---------------|
| Total No. of AA           | 370   | 290          | 273               | 147            | 297            | 834           | 984           | 654           | 504           |
| No. of AA with Identity   | 55    | 38           | 36                | 24             | 64             | 121           | 161           | 210           | 170           |
| No. of AA with Similarity | 155   | 107          | 100               | 69             | 151            | 345           | 427           | 410           | 327           |
| % Identity                | 14.9% | 13.1%        | 13.2%             | 16.8%          | 21.5%          | 14.5%         | 16.4%         | 32.1%         | 33.7%         |
| % Similarity              | 41.9% | <b>36.9%</b> | <b>36.6%</b>      | 54.7%          | 50.8%          | 41.4%         | 43.4%         | <b>62.7%</b>  | <b>64.9%</b>  |

**A**

YP009724390.1\_ScCoV2\_Wuhan  
AB088222.1\_FCoV1\_UCD-1

TRWRVYSTGSN----VFQTRAGCLIGAEHVNSYECDIPIGAGICASYQTQTNSP**RR**RS↓  
T**HSRRSR**GSTSTSVTTYTMPQFYITKWNNDTSTNCTSVITYSS-----FA  
\*        \*     \*\*               :               \*               :     \*     :     \*               \*

**Proposed RBD** ←

← S1/S2 →  
CTD ←

CTD ← S1/S2 →





**Fig. S5**

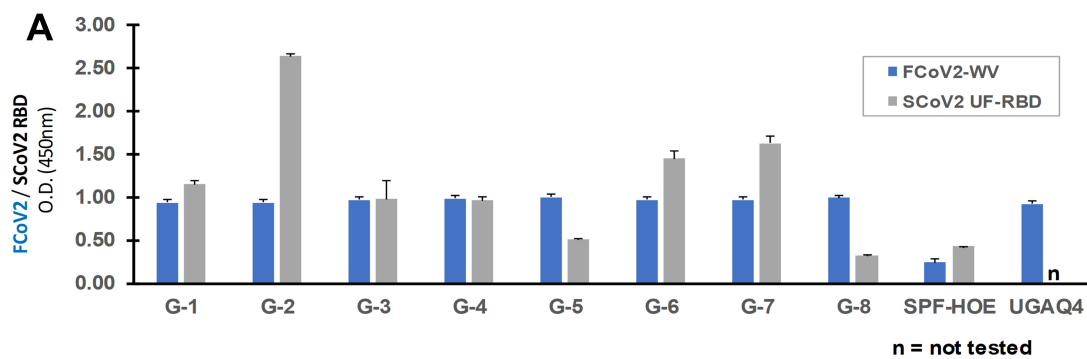

**B1 SCoV2 RBD Immunoblot Analyses**

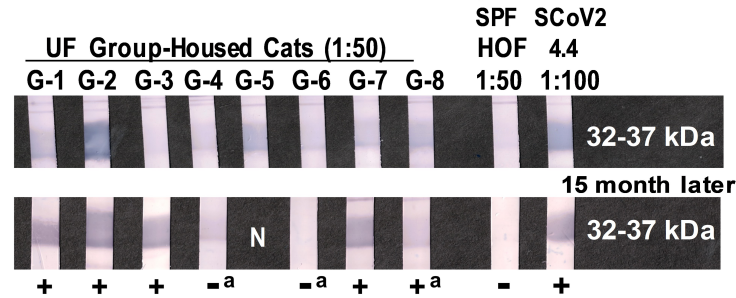

**B2 FCoV2 RBD Immunoblot Analyses**

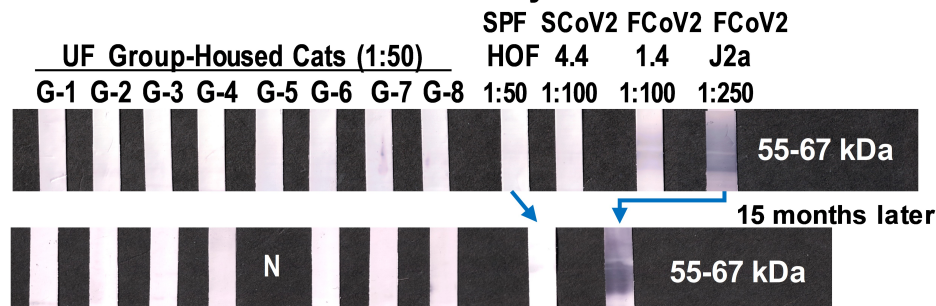

**C1 FCoV2-WV Immunoblot Analysis**

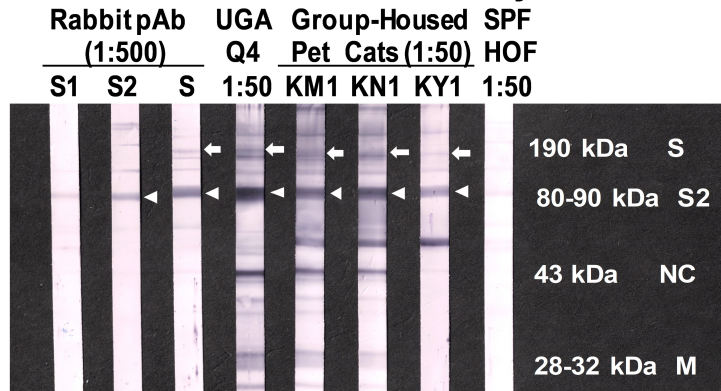

**B3 FCoV2-WV Immunoblot Analyses**

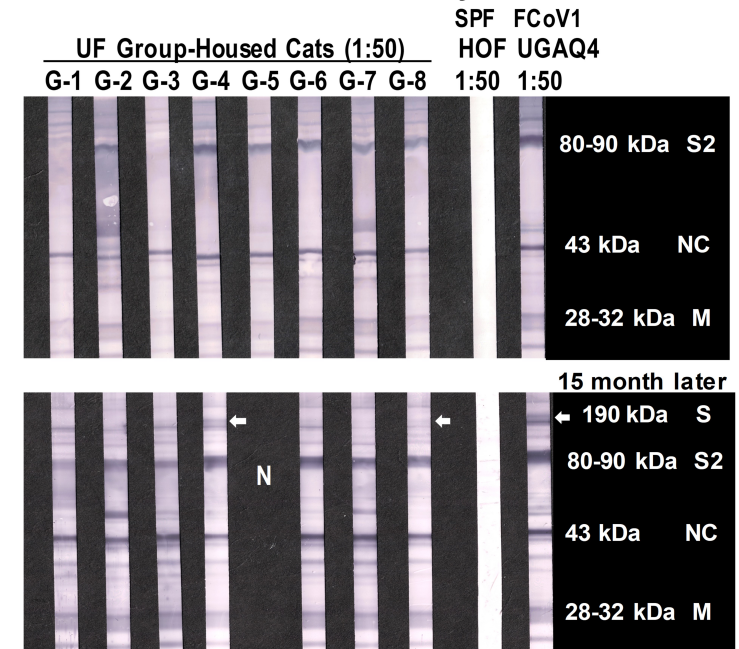

**B4 FCoV1 RBD Immunoblot Analyses**

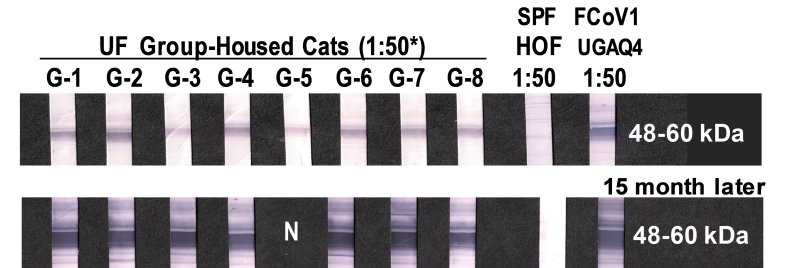

**C2 RBD Immunoblot Analyses**

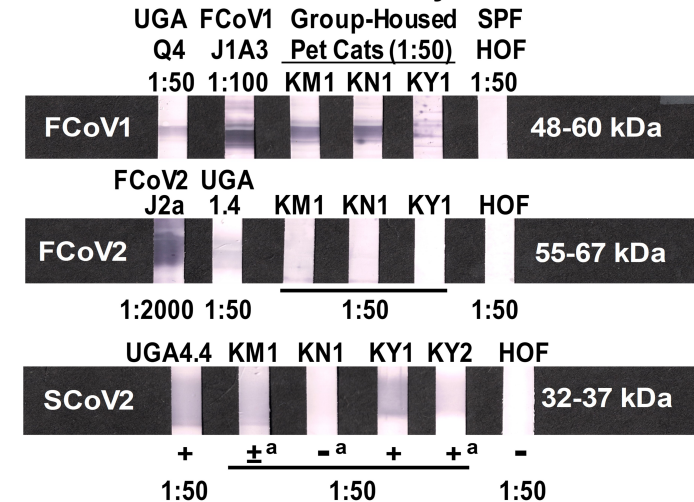

# A

**Signal Peptide** → **NTD / S1**  
 YP\_009724390.1\_SCoV2\_Wuhan MFVFLVLLPLVSSQCVNLTT--RTQLPPAY--TNSFTRGVYYPDKVFRSSSVLHSTQDLFL  
 YP\_009825051.1\_SCoV1\_Tor2 MFIFLLFLTLTSGSDLDRCTTFDDVQAPNYTQHTSSMRGVYYPDEIFRSDTLYLTDLFL  
 \*\*:\*\*\*::\* \*.\*.. :: \* \* \* \* \*:\*\*\*.:\*: \*\*\*\*\*  
  
 YP\_009724390.1\_SCoV2\_Wuhan PFFSNVTWFHAIHVSGTNGTKRFDNPVLPFNDGVYFASTEKSNIRGWIFGTTLDSKTQS  
 YP\_009825051.1\_SCoV1\_Tor2 PFYSNVTGFHTIN-----HTFGNPVPIPKDGIYFAATEKSNVVRGWVFGSTMNKSQS  
 \*\*:\*\*\* \*\*:\* : \* \*\*\*:\*\*:\*:\*\*\*:\*\*\*\*\*:\*\*\*:\*\*\*:\*.:.:\*\*\*  
  
 YP\_009724390.1\_SCoV2\_Wuhan LLIVNNATNVVIKVCFFQFCNDPFLGVYYHKNKNSWMESEFRVYSSANNCTFEYVSQPFL  
 YP\_009825051.1\_SCoV1\_Tor2 VIIINNSTNVVIRACNFELCDNPFFAVSKPMGT---QTHMTIFDNAFNCTFEYISDAFS  
 :\*:\*\*\*:\*\*\*\*\*.:\*:\*:\*:\*:\*\*\*.\* . :.. :...\* \*\*\*\*\*:\*.  
  
 YP\_009724390.1\_SCoV2\_Wuhan MDLEGKQGNFKNLREFVFKNIDGYFKIYSKHPTINLVRDLPGGFSALEPLVDLPIGINIT  
 YP\_009825051.1\_SCoV1\_Tor2 LDVSEKSGNFKHLREFVFKNKDGLYVYKGYQPIDVVRDLPSGFNTLKPFIKPLGINIT  
 :\*:. \*.\*\*\*\*.\*\*\*\*\* \*\*:: :\*. : \*\*::\*\*\*\*.\*\*\*:\*\*\*:..\*:\*:\*\*\*\*\*  
  
 YP\_009724390.1\_SCoV2\_Wuhan RFQTLALHRSYLTPGDSSSGWTAGAAAYVGYLQPRFTLLKYNENGTITDAVDCALDPL  
 YP\_009825051.1\_SCoV1\_Tor2 NFRAILTAFS-----PAQDIWGTSAAYFVGYLKPTTFMLKYDENGITDAVDCSQNPL  
 .\*:\*\*\*: . :.. \* :.\*\*\*\*:\*\*\*\*:\* \*\*:\*:\*\*\*:\*\*\*\*\*:\*\*\*: :\*\*  
  
**NTD** ← **RBD / S1**  
 YP\_009724390.1\_SCoV2\_Wuhan SETKCTLKSFTEVEKGIYQTSNFRVQPTESIVRFPNITNLCPFGEVFNATRFASVYAWNRR  
 YP\_009825051.1\_SCoV1\_Tor2 AELKCSVKSEFIDKGIYQTSNFRVVPSPGDVVRFPNITNLCPFGEVFNATKFPSVYAWERK  
 :\* \*\*::\*\*\* :\*:\*\*\*\*\* \*\* :. :\*\*\*\*\*:\*\*\*:\*\*\*:\*\*\*\*\*:\*\*\*:\*\*\*  
  
 YP\_009724390.1\_SCoV2\_Wuhan RISNCVADYSVLYNSASFSTFKCYGVSPTKLNLDLCTNVYADSFVIRGDEVQRQIAPGQTG  
 YP\_009825051.1\_SCoV1\_Tor2 KISNCVADYSVLYNSTFFSTFKCYGVSATKLNLDLCSNVYADSFVVKGDDEVQRQIAPGQTG  
 :\*\*\*\*\*: \*\*\*\*\* \*\*\*\*\*:\*\*\*\*\*:\*\*\*:\*\*\*\*\*  
  
 YP\_009724390.1\_SCoV2\_Wuhan KIADYNYKLPPDFTGCVIAWNSNNLDSKVGNGYNYLYRLFRKSNLKPFERDISTEIQAG  
 YP\_009825051.1\_SCoV1\_Tor2 VIADYNYKLPPDFMGCVLAWNTRNIDATSTGNYNKYRYLRHGKLRPFERDISNVFPSPD  
 \*\*\*\*\* \*\*\*:\*\*\*:\*.\*:.. \*\*\*\*\* \*\* :\*:..:\*\*\*\*\*. :.  
  
**RBD** ←  
 YP\_009724390.1\_SCoV2\_Wuhan STPCNGVEGFNCYFPLQSYGFGPTNGVGYQPYRVVVLSEFELHAPATVCGPKKSTNLVKN  
 YP\_009825051.1\_SCoV1\_Tor2 GKPCPTP-PALNCYWPLNDYGFYTTTGIGYQPYRVVVLSEFELNAPATVCGPKLSTDLIKN  
 ..\*\* .:\*\*\*:\*\*\*:\*\*\* \*.\*:\*\*\*\*\*:\*\*\*\*\*:\*\*\*\*\* \*\*\*:\*\*\*  
  
**CTD / S1**  
 YP\_009724390.1\_SCoV2\_Wuhan KCVNFFNFNGLTGTGVLTESNKKFLPFQQFGRDIADTTDAVRDPQTLEILDITPCSFGGVS  
 YP\_009825051.1\_SCoV1\_Tor2 QCVNFFNFNGLTGTGVLTPSSKRFQFPQQFGRDVSDFTDSVRDPKTSEILDISPACFAGGVS  
 :\*\*\*\*\* \*\*:\* \* \*\*\*\*\*:\*. \*\*\*:\*\*\*:\*\*\*:\*\*\*\*\*:\*\*\*:\*\*\*  
  
 YP\_009724390.1\_SCoV2\_Wuhan VITPGTNTSNQVAVLYQDVNCTEVPVAIHADQLTPTWRVYSTGSNVFQTRAGCLIGAEHV  
 YP\_009825051.1\_SCoV1\_Tor2 VITPGTNASSEVAVLYQDVNCTDVSTAIHADQLTPAWRIYSTGNNVVFQTAGCLIGAEHV  
 \*\*\*\*\*:\*. :\*\*\*\*\*:\*. \*\*\*\*\*:\*\*\*:\*\*\*. \*\*\*\*\*:\*\*\*\*\*  
  
**CTD** ← **S1/S2** →  
 YP\_009724390.1\_SCoV2\_Wuhan NNSYECDIPIGAGICASYQTQTNSPRRARSVASQSIIAYTMSLGAENSVAYSNNNSIAIPT  
 YP\_009825051.1\_SCoV1\_Tor2 DTSYECDIPIGAGICASYHTVSL---LRSTSQKSIVAYTMSLGADSSIAYSNNNTIAIPT  
 :.\*\*\*\*\*:\*. : \*\*\*:..:\*\*\*:\*\*\*\*\*:\*.\*:\*\*\*:\*\*\*\*\*  
  
 YP\_009724390.1\_SCoV2\_Wuhan NFTISVTTEILPVSMKTSTVDCTMYICGDSTECNLLLQYGSFCTQLNRLTGLIAVEQDK  
 YP\_009825051.1\_SCoV1\_Tor2 NFSISITTEVMPVSMAKTSVDCNMYICGDSTECANLLLQYGSFCTQLNRLSGIAAEQDR  
 \*\*:\*\*\*:\*\*\*:\*\*\*\*:\*\*\*\*\*:\*\*\*\*\*.\*\*\*\*\*:\*\*\*\*\*:\*\*\*\*\*:\*\*\*:\*\*\*:  
  
**S2'** **Fusion Peptide (FP)**  
 YP\_009724390.1\_SCoV2\_Wuhan NTQEVFAQVKQIYKTPPIKDFGGFNFSQILPDPSKPSKRSFIEDLLFNKVTLDAGFIKQ  
 YP\_009825051.1\_SCoV1\_Tor2 NTREVFQAQVKQMYKTPPTLKYFGGFNFSQILPDPLKPTKRSFIEDLLFNKVTLDAGFMKQ  
 \*\*\*\*\*:\*\*\*:\*\*\*.\*\*\*\*\*:\*\*\*\*\*.\*\*\*\*\*:\*\*\*\*\*:\*\*\*\*\*:\*\*\*\*\*:\*\*\*:\*\*\*:

|                            |                                                                                                                              |
|----------------------------|------------------------------------------------------------------------------------------------------------------------------|
| YP_009724390.1_SCoV2_Wuhan | YGDCLGDIARDLICAQKFNGLTVLPPLLTDemiaQYTSALLAGTITSGWTFGAGAALQI                                                                  |
| YP_009825051.1_SCoV1_Tor2  | YGECLGDINARDLICAQKFNGLTVLPPLLTDMMIAAYTAALVSGTATAGWTFGAGAALQI<br>*:*****:*** **:::* *:*****                                   |
| YP_009724390.1_SCoV2_Wuhan | PFAMQMAYRFNGIGVTQNVLYENQKLIANQFNsaIGKIQDSLSTASALGKLQDVVNQNA                                                                  |
| YP_009825051.1_SCoV1_Tor2  | PFAMQMAYRFNGIGVTQNVLYENQKQIANQFNKAISQIQESLTtTSTALGKLQDVVNQNA<br>*****.***.***:***:***:*****                                  |
| YP_009724390.1_SCoV2_Wuhan | QALNTLVKQLSSNFGAISSVLNDILSRldKVEAEVQIDRLITGRLQSLQTYVTQQLIRAA                                                                 |
| YP_009825051.1_SCoV1_Tor2  | QALNTLVKQLSSNFGAISSVLNDILSRldKVEAEVQIDRLITGRLQSLQTYVTQQLIRAA<br>*****                                                        |
| YP_009724390.1_SCoV2_Wuhan | EIRASANLAATKMSECVLGQSKRVDFCGKGYHLMSFPQSAPHGVVFLHVTYVPAQEKNFT                                                                 |
| YP_009825051.1_SCoV1_Tor2  | EIRASANLAATKMSECVLGQSKRVDFCGKGYHLMSFPQAAPHGVVFLHVTYVPSQERNFT<br>*****:*****:***:***                                          |
| YP_009724390.1_SCoV2_Wuhan | TAPAICHdGKAHFPREGVfVSNgTHWfVTQRNFYEPQIITDNTfVSGNCDVVIGIVNNT                                                                  |
| YP_009825051.1_SCoV1_Tor2  | TAPAICHEGKAYFPREGVfVNGTSWfITQRNFSPQIITDNTfVSGNCDVVIGIINNT<br>*****:***:***** ** *:***: . *****:***                           |
|                            | <div style="border: 1px dashed red; padding: 2px; display: inline-block;"> <b>Stem Helix (SH)</b><br/> <b>SH Core</b> </div> |
| YP_009724390.1_SCoV2_Wuhan | VYDPLQPELDSFKEELDKYfKNHTSPDVLGDISGINASVVNIQKEIDRLNEVAKNLNEs                                                                  |
| YP_009825051.1_SCoV1_Tor2  | VYDPLQPELDSFKEELDKYfKNHTSPDVLGDISGINASVVNIQKEIDRLNEVAKNLNEs<br>*****                                                         |
| YP_009724390.1_SCoV2_Wuhan | LIDLQELGKYEQYIKWPWYIwLGFIAGLIAIVMTIMLCCMTSCCScLKGCCScGSCCKF                                                                  |
| YP_009825051.1_SCoV1_Tor2  | LIDLQELGKYEQYIKWPWYVwLGFIAGLIAIVMTILCCMTSCCScLKGAcsGScGSCCKF<br>*****:*****:*****.*****                                      |
| YP_009724390.1_SCoV2_Wuhan | DEDDSEPVLKGvKLHYT                                                                                                            |
| YP_009825051.1_SCoV1_Tor2  | DEDDSEPVLKGvKLHYT<br>*****                                                                                                   |

## B

### Summary of Amino Acid (AA) Sequence Identity and Similarity between SCoV2 and SCoV1

|                           | NTD          | RBD   | CTD   | S1    | S2           | Spike |
|---------------------------|--------------|-------|-------|-------|--------------|-------|
| Total No. of AA           | 322          | 211   | 144   | 676   | 588          | 1277  |
| No. of AA with Identity   | 164          | 154   | 111   | 438   | 529          | 967   |
| No. of AA with Similarity | 259          | 190   | 132   | 594   | 579          | 1173  |
| % Identity                | 50.9%        | 73.0% | 77.1% | 64.8% | 90.0%        | 75.7% |
| % Similarity              | <b>80.4%</b> | 90.0% | 91.7% | 87.9% | <b>98.5%</b> | 91.9% |

## Figure S7. SCoV2 UF2-RBD Sequence with AA Extensions

**A** **RTFLLKYNENGTITDAVDCALDPLSETKCTLKSFTVEKGIYQTSNFRVQPTESIVRFPNITNLCPFGGEVFNAT**  
**RFASVYAWNRRKRISNCVADYSVLYNSASFSTFKCYGVSPTKLNDLCFTNVYADSFVIRGDEVQRQIAPGQTGKI**  
**ADYNYKLPDDFTGCVIAWNSNNLDSKVGGNYYLYRLFRKSNLKPFERDISTEIIYQAGSTPCNGVEGFNCYFP**  
**LQSYGFQPTNGVGYQPYRVVVLVSFELLHAPATVCGPKKSTNLVKNKCVNF**

### B SCoV2 RBD Immunoblot Analysis

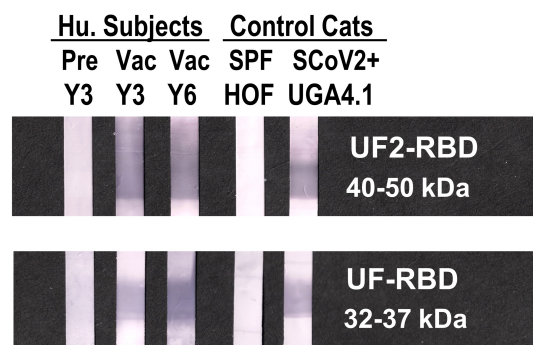

### C Description of Human Subjects\* and Laboratory Cats

| Subject or Cat | Age (yr)<br>Gender | Vac<br>Freq | Vaccination<br>Types            | SCoV2<br>Infection |
|----------------|--------------------|-------------|---------------------------------|--------------------|
| Y3 Pre         | 63F                | -           | -                               | -                  |
| Y3 Vac         | 68F                | 3           | Pfizer S mRNA                   | -                  |
| Y6 Vac         | 38F                | 3           | Astra-Zeneca-S<br>Pfizer S mRNA | -                  |
| UGA4.1         | 1F                 | -           | -                               | +                  |
| SPF HOF        | 1F                 | -           | -                               | -                  |

\* Blood from the subjects collected using UF IRB202002902.

\*\* Abbreviations: year (yr), Vaccinated/Vaccination (Vac), frequency (Freq), Pre-vaccination (Pre), female (F), human (Hu), specific pathogen free (SPF)



# A

KP981644\_CCoV2a\_Italy\_CB/05  
KC175339\_CCoV2\_Germany\_171  
KC175340\_CCoV2\_US,NY\_K378  
KC175341\_CCoV2\_US,NY\_S378  
JQ404410\_CCoV2\_US,GA\_UGA-TN449  
JQ404409\_CCoV2\_US,GA\_UGA-1-71  
KY063616\_CCoV2\_China\_HLJ071  
KY063617\_CCoV2\_China\_HLJ072  
KY063618\_CCoV2\_China\_HLJ073  
GQ477367\_CCoV2\_Taiwan\_NTU336  
GQ152141\_FCoV2\_Taiwan\_NTU156  
JQ408981\_FCoV2\_Hungary\_DF2  
JN634064\_FCoV2\_WSU79-1683  
**DQ010921\_FCoV2\_WSU79-1146**

[illegible]

KP981644\_CCoV2a\_Italy\_CB/05  
KC175339\_CCoV2\_Germany\_171  
KC175340\_CCoV2\_US,NY\_K378  
KC175341\_CCoV2\_US,NY\_S378  
JQ404410\_CCoV2\_US,GA\_UGA-TN449  
JQ404409\_CCoV2\_US,GA\_UGA-1-71  
KY063616\_CCoV2\_China\_HLJ071  
KY063617\_CCoV2\_China\_HLJ072  
KY063618\_CCoV2\_China\_HLJ073  
GQ477367\_CCoV2\_Taiwan\_NTU336  
GQ152141\_FCoV2\_Taiwan\_NTU156  
JN408981\_FCoV2\_Hungary\_DF2  
JN634064\_FCoV2\_WSU79-1683  
**DQ010921\_FCoV2\_WSU79-1146**

R Y C Y A L Y N G T A L K Y L G T L P P S V K E I A I S K W G H F Y I N G Y N F F S T F P I D C I S F N L T T G T S G A  
R Y C Y V L Y N G T A L K Y L G T L P P S V K E I A I S K W G H F Y I N G Y N F F S T F P I G C I S F N L T T G V S G A  
R Y C F A L Y N G T A L K Y L G T L P P S V K E I A I S K W G H F Y I N G Y N F F S T F P I D C I S F N L T T G D S G A  
R Y C F A L Y N G T A L K Y L G T L P P S V K E I A I S K W G H F Y I N G Y N F F S T F P I D C I S F N L T T G D S G A  
R Y C Y V L Y N G T A L K Y L G T L P P S V K E I A I S K W G H F Y I N G Y N F F S T F P I D C I S F N L T T G A S G A  
R Y C Y A L Y N G T A L K Y L G T L P P S V K E I A I S K W G H F Y I N G Y N F F S T F P I D C I S F N L T T G D S G A  
R Y C Y V L Y N G T A L K Y L G T L P P S V K E I A I S K W G H F Y I N G Y N F F S T F P I D C I S F N L T T G A S G A  
R Y C Y V L Y N G T A L K Y L G T L P P S V K E I A I S K W G H F Y I N G Y N F F S T F P I D C I S F N L T T G A S G A  
R Y C Y V L Y N G T A L K Y L G T L P P S V K E I A I S K W G H F Y I N G Y N F F S T F P I D C I S F N L T T G A S G A  
R Y C Y V L Y N G T A L K Y L G T L P P S V K E I A I S K W G H F Y I N G Y N F F S T F P I D C I S F N L T T G A S G A  
R Y C Y V L Y N G T A L K Y L G T L P P S V K E I A I S K W G H F Y I N G Y N F F S T F P I G C I S F N L T T G A S G A  
R Y C Y V L Y N G T A L K Y L G T L P P S V K E I A I S K W G H F Y I N G Y N F F S T F P I D C I S F N L T T G D S G A  
**R Y C Y V L Y N G T A L K Y L G T L P P S V K E I A I S K W G H F Y I N G Y N F F S T F P I G C I S F N L T T G V S G A**  
\*\*\*. \*\*\*\*\*.\*\*\*\*\*.\*\*\*\*\*.\*\*\*\*\*.\*\*\*\*\*.\*\*\*\*\*.\*\*\*\*\*.\*\*\*\*\*.\*\*\*\*\*.\*\*\*\*\*.\*\*\*\*\*.\*\*\*\*\*.\*\*\*\*\*.

**Proposed RBD / S1**

RBD  
53T  
51I  
51S

KP981644\_CCoV2a\_Italy\_CB/05  
KC175339\_CCoV2\_Germany\_171  
KC175340\_CCoV2\_US,NY\_K378  
KC175341\_CCoV2\_US,NY\_S378  
JQ404410\_CCoV2\_US,GA\_UGA-TN449  
JQ404409\_CCoV2\_US,GA\_UGA-1-71  
KY063616\_CCoV2\_China\_HLJ071  
KY063617\_CCoV2\_China\_HLJ072  
KY063618\_CCoV2\_China\_HLJ073  
GQ477367\_CCoV2\_Taiwan\_NTU336  
GQ152141\_FCoV2\_Taiwan\_NTU156  
JN408981\_FCoV2\_Hungary\_DF2  
JN634064\_FCoV2\_WSU79-1683  
**DQ010921\_FCoV2\_WSU79-1146**

[illegible]

**Proposed RBD** ←

RBD Total (T): 268 aa  
RBD Identity (I): 235 / 268 = 87.7%  
RBD Similarity (S): 257 / 268 = 95.9 %

KP981644\_CCov2a\_Italy\_CB/05  
KC175339\_CCov2\_Germany\_171  
KC175340\_CCov2\_US,NY\_K378  
KC175341\_CCov2\_US,NY\_S378  
JQ404410\_CCov2\_US,GA\_UGA-TN449  
JQ404409\_CCov2\_US,GA\_UGA-1-71  
KY063616\_CCov2\_China\_HLJ071  
KY063617\_CCov2\_China\_HLJ072  
KY063618\_CCov2\_China\_HLJ073  
GQ477367\_CCov2\_Taiwan\_NTU336  
GQ152141\_FCoV2\_Taiwan\_NTU156  
JQ408981\_FCoV2\_Hungary\_DF2  
JN634064\_FCoV2\_WSU79-1683  
**DQ010921\_FCoV2\_WSU79-1146**

KP981644\_CCov2a\_Italy\_CB/05  
KC175339\_CCov2\_Germany\_171  
KC175340\_CCov2\_US,NY\_K378  
KC175341\_CCov2\_US,NY\_S378  
JQ404410\_CCov2\_US,GA\_UGA-TN449  
JQ404409\_CCov2\_US,GA\_UGA-1-71  
KY063616\_CCov2\_China\_HLJ071  
KY063617\_CCov2\_China\_HLJ072  
KY063618\_CCov2\_China\_HLJ073  
GQ477367\_CCov2\_Taiwan\_NTU336  
GQ152141\_FCoV2\_Taiwan\_NTU156  
JQ408981\_FCoV2\_Hungary\_DF2  
JN634064\_FCoV2\_WSU79-1683  
**DQ010921\_FCoV2\_WSU79-1146**

KP981644\_CCov2a\_Italy\_CB/05  
KC175339\_CCov2\_Germany\_171  
KC175340\_CCov2\_US,NY\_K378  
KC175341\_CCov2\_US,NY\_S378  
JQ404410\_CCov2\_US,GA\_UGA-TN449  
JQ404409\_CCov2\_US,GA\_UGA-1-71  
KY063616\_CCov2\_China\_HLJ071  
KY063617\_CCov2\_China\_HLJ072  
KY063618\_CCov2\_China\_HLJ073  
GQ477367\_CCov2\_Taiwan\_NTU336  
GQ152141\_FCoV2\_Taiwan\_NTU156  
JQ408981\_FCoV2\_Hungary\_DF2  
JN634064\_FCoV2\_WSU79-1683  
**DQ010921\_FCoV2\_WSU79-1146**

KP981644\_CCov2a\_Italy\_CB/05  
KC175339\_CCov2\_Germany\_171  
KC175340\_CCov2\_US,NY\_K378  
KC175341\_CCov2\_US,NY\_S378  
JQ404410\_CCov2\_US,GA\_UGA-TN449  
JQ404409\_CCov2\_US,GA\_UGA-1-71  
KY063616\_CCov2\_China\_HLJ071  
KY063617\_CCov2\_China\_HLJ072  
KY063618\_CCov2\_China\_HLJ073  
GQ477367\_CCov2\_Taiwan\_NTU336  
GQ152141\_FCoV2\_Taiwan\_NTU156  
JQ408981\_FCoV2\_Hungary\_DF2  
JN634064\_FCoV2\_WSU79-1683  
**DQ010921\_FCoV2\_WSU79-1146**

GIIRQTNSTLLSGLYYTSLSGDLLGFKNVSDGVVYSVTPCDVSAQAVIDGAIVGAMTSI  
GIIRRTNSTLLSGLYYTSLSGDLLGFKNVSDGVVYSVTPCDVSAQAVIDGAIVGAMTSI  
GIIRQTNSTLLSGLYYTSLSGDLLGFKNVSDGVVYSVTPCDVSAHAVIDGAIVGAMTSI  
GIIRQTNSTLLSGLYYTSLSGDLLGFKNVSDGVVYSVTPCDVSAQAVIDGAIVGAMTSI  
**GIIRRTNSTLLSGLYYTSLSGDLLGFKNVSDGVVYSVTPCDVSVQAVIDGAIVGAMTSI**  
\*\*\*\*.\*\*\*\*.\*\*\*\*\*.\*\*\*.\*\*\*\*\*.:.\*\*\*\*\*

NSELLGLTHWTTTPNFYYYSIYNYTNARTRGTAIDSNDVDCEPIITYSNIGVCKNGALVF  
NSELLGLTHWTTTPNFYYYSIYNYTSERTRGTAIDSNDVDCEPVITYSNIGVCKNGALVF  
NSELLGLTHWTTTPNFYYYSIYNYTNERTRGTAIDSNDVDCEPIITYSNIGVCKNGALVF  
NSELLGLTHWTTTPNFYYYSIYNYTNERTRGTAIDSNDVDCEPIITYSNIGVCKNGALVF  
NSELLGLTHWTTTPNFYYYSIYNYTNERTRGTAIDSNDVDCEPIITYANIGVCKNGALVF  
NSELLGLTHWTTTPNFYYYSIYNYTNERTRGTAIDSNDVDCEPIITYSNIGVCKNGALVF  
NSELLGLTHWTTTPNFYYYSIYNYTNERTRGTAIDSNDVDCEPIITYANIGVCKNGALVF  
NSELLGLTHWTTTPNFYYYSIYNYTNERTRGTAIDSNDVDCEPIITYANIGVCKNGALVF  
NSELLGLTHWTTTPNFYYYSIYNYTNERTRGTAIDSNDVDCEPIITYANIGVCKNGALVF  
NSELLGLTHWTTTPNFYYYSIYNYTNERTRGTAIDSNDVDCEPIITYSNIGVCKNGALVF  
NSELLGLTHWTTTPNFYYYSIYNYTNERTRGTAIDSNAVDCEPIITYSNIGVCKNGALVF  
NSELLGLTHWTTTPNFYYYSIYNYTSERTRGTAIDSNDVDCEPVITYSNIGVCKNGALVF  
NSELLGLKHWTTTPNFYYYSIYNYTNERTRGTAIDSNDVDCEPIITYSNIGVCKNGALVF  
**NSELLGLTHWTTTPNFYYYSIYNYTSERTRGTAIDSNDVDCEPVITYSNIGVCKNGALVF**  
\*\*\*\*\*.\*\*\*\*\*.\*\*\*\*\*.\*\*\*\*\*.\*\*\*.\*\*\*\*\*

INVTHSDGDVQPISTGNVTIPTNFTISVQVEYIQVYTPVPSIDCSRYVCNGNPRCNKLLT  
INVTHSDGDVQPISTGNVTIPTNFTISVQVEYMQVYTPVPSIDCARYVCNGNPRCNKLLT  
INVTHSDGDVQPISTGNVTIPTNFTISVQVEYIQVYTPVPSIDCSRYVCNGNPRCNKLLT  
INVTHSDGDVQPISTGNVTIPTNFTISVQVEYIQVYTPVPSIDCSRYVCNGNPRCNKLLT  
INVTHSDGDVQPISTGNVTIPTNFTISVQVEYIQVYTPVPSIDCSRYVCNGNPRCNKLLT  
INVTHSDGDVQPISTGNVTIPTNFTISVQVEYIQVYTPVPSIDCSRYVCNGNPRCNKLLT  
INVTHSDGDVQPISTGNVTIPTNFTISVQVEYIQVYTPVPSIDCSRYVCNGNPRCNKLLT  
INVTHSDGDVQPISTGNVTIPTNFTISVQVEYIQVYTPVPSIDCSRYVCNGNPRCNKLLT  
INVTHSDGDVQPISTGNVTIPTNFTISVQVEYIQVYTPVPSIDCSRYVCNGNPRCNKLLT  
INVTHSDGDVQPISTGNVTIPTNFTISVQVEYIQVYTPVPSIDCSRYVCNGNPRCNKLLT  
INVTHSDGDVQPISTGNVTIPTNFTISVQVEYIQVYTPVPSIDCSRYVCNGNPRCNKLLT  
INVTHSDGDVQPISTGNVTIPTNFTISVQVEYMQVYTPVPSIDCARYVCNGNPRCNKLLT  
INVTHSDGDVQPISTGTVTIPTNFTISVQVEYIQVYTPVPSIDCARYVCNGNPRCNKLLT  
**INVTHSDGDVQPISTGNVTIPTNFTISVQVEYMQVYTPVPSIDCARYVCNGNPRCNKLLT**  
\*\*\*\*\*.\*\*\*\*\*.\*\*\*\*\*.\*\*\*\*\*.\*\*\*\*\*

QYVSACQTIEQALAMGARLENMEVDSMLFVSENALKLASVEAFNSTETLDPIYKEWPNIG  
QYVSACQTIEQALAMGARLENMEVDSMLFVSENALKLASVEAFNSTENLDPIYKEWPSIG  
QYVSACQTIEQALAMGARLENMEIDSMLFVSENALKLASVEAFNSTETLDPIYKEWPNIG  
QYVSACQTIEQALAMGARLENMEIDSMLFVSENALKLASVEAFNSTETLDPIYKEWPNIG  
QYVSACQTIEQALAMGARLENMEVDSMLFVSENALKLASVEAFNSTENLDPIYKEWPNIG  
**QYVSACQTIEQALAMGARLENMEVDSMLFVSENALKLASVEAFNSTENLDPIYKEWPSIG**  
\*\*\*\*\*.\*\*\*\*\*.\*\*\*\*\*.\*\*\*\*\*.\*\*\*\*\*



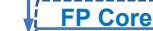[illegible]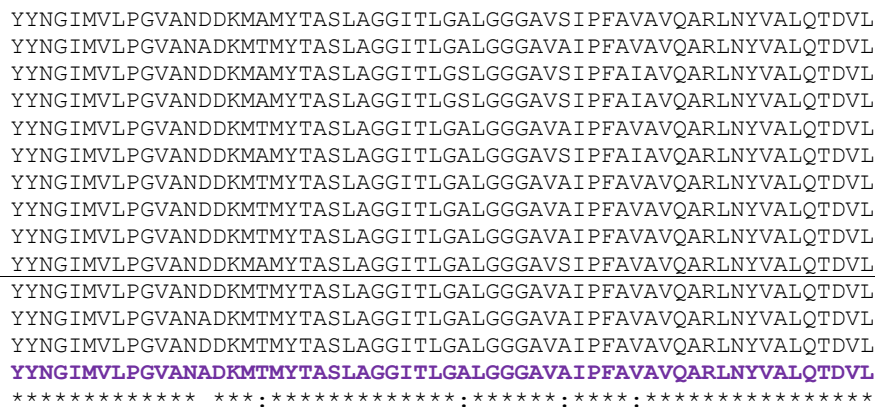

NKNQQILANAFNQAIGNITQAFGKVNDIAIHQTSKGLATVAKALAKVDVVNTQGQALSHL  
NKNQQILANAFNQAIGNITQAFGKVNDIAIHQTSQGLATVAKALAKVDVVNTQGQALSHL  
NKNQQILANAFNQAIGNITQAFGKVNDIAIHQTSQGLATVAKVLAKVDVVNTQGQALSHL  
NKNQQILANAFNQAIGNITQAFGKVNDIAIHQTSQGLATVAKVLAKVDVVNTQGQALSHL  
NKNQQILANAFNQAIGNITQAFGKVNDIAIHQTSQGLATVAKALAKVDVVNTQGQALSHL  
**NKNQQILANAFNQAIGNITQAFGKVNDIAIHQTSQGLATVAKALAKVDVVNTQGQALSHL**  
\*\*\*\*\* \* \*\*\*\*\* \*

[illegible]



KP981644\_CCoV2a\_Italy\_CB/05  
KC175339\_CCoV2\_Germany\_171  
KC175340\_CCoV2\_US,NY\_K378  
KC175341\_CCoV2\_US,NY\_S378  
JQ404410\_CCoV2\_US,GA\_UGA-TN449  
JQ404409\_CCoV2\_US,GA\_UGA-1-71  
KY063616\_CCoV2\_China\_HLJ071  
KY063617\_CCoV2\_China\_HLJ072  
KY063618\_CCoV2\_China\_HLJ073  
GQ477367\_CCoV2\_Taiwan\_NTU336

---

GQ152141\_FCoV2\_Taiwan\_NTU156  
JQ408981\_FCoV2\_Hungary\_DF2  
JN634064\_FCoV2\_WSU79-1683  
**DQ010921\_FCoV2\_WSU79-1146**

KP981644\_CCoV2a\_Italy\_CB/05  
KC175339\_CCoV2\_Germany\_171  
KC175340\_CCoV2\_US,NY\_K378  
KC175341\_CCoV2\_US,NY\_S378  
JQ404410\_CCoV2\_US,GA\_UGA-TN449  
JQ404409\_CCoV2\_US,GA\_UGA-1-71  
KY063616\_CCoV2\_China\_HLJ071  
KY063617\_CCoV2\_China\_HLJ072  
KY063618\_CCoV2\_China\_HLJ073  
GQ477367\_CCoV2\_Taiwan\_NTU336  
GQ152141\_FCoV2\_Taiwan\_NTU156  
JQ408981\_FCoV2\_Hungary\_DF2  
JN634064\_FCoV2\_WSU79-1683  
**DQ010921\_FCoV2\_WSU79-1146**

[illegible]

**Stem Helix (SH)**

**SH Core**

IELPSIIPDYIDINQTVQDILENYPNPWTVPELTLDIFNATYLNLTGEINDLEFRSEKLH  
IDLPSIIPDYIDINQTVQDILENYPNPWTVPEFTLDIFNATYLNLTGEIDDLEFRSEKLH  
IDLPSIIPDYIDINQTVQDILENFRPNWTVPELPLDIFNATYLNLTGEINDLEFRSEKLH  
IDLPSIIPDYIDINQTVQDILENFRPNWTVPELPLDIFNATYLNLTGEINDLEFRSEKLH  
IDLPSIIPDYIDINQTVQDILENYPNPWTVPELTLDIFNATYLNLTGEIDDLEFRSEKLH  
IDLPSIIPDYIDINQTVQDILENFRPNWTVPELPLDIFNATYLNLTGEINDLEFRSEKLH  
IDLPSIIPDYIDINQTVQDILENYPNPWTVPELTLDIFNATYLNLTGEIDDLEFRSEKLH  
IDLPSIIPDYIDINQTVQDILENYPNPWTVPELTLDIFNATYLNLTGEIDDLEFRSEKLH  
IDLPSIIPDYIDINQTVQDILENYPNPWTVPELTLDIFNATYLNLTGEIDDLEFRSEKLH  
IDLPSIIPDYIDINQTVQDILENYPNPWTVPELTLDIFNATYLNLTGEIDDLEFRSEKLH  
IDLPSIIPDYIDINQTVQDILENYPNPWTVPELTLDIFNATYLNLTGEIDDLEFRSEKLH  
IDLPSIIPDYIDINQTVQDILENYPNPWTVPELTLDIFNATYLNLTGEIDDLEFRSEKLH  
IDLPSIIPDYIDINQTVQDILENYPNPWTVPELTLDIFNATYLNLTGEIDDLEFRSEKLH  
IDLPSIIPDYIDINQTVQDILENYPNPWTVPELTLDIFNATYLNLTGEIDDLEFRSEKLH  
**IDLPSIIPDYIDINQTVQDILENYEPNPWTVPEFTLDIFNATYLNLTGEIDDLEFRSEKLH**  
\*.\*\*\*\*\*.\*\*\*\*\*.\*\*\*\*\*.\*\*\*\*\*.\*\*\*\*\*.\*\*\*\*\*.\*\*\*\*\*.

[illegible]

|                                  |                                         |
|----------------------------------|-----------------------------------------|
| KP981644_CCoV2a_Italy_CB/05      | CGCIGCLGSCCHSICSRRQFENYEPIEKVHVH        |
| KC175339_CCoV2_Germany_171       | CGCIGCLGSCCHSICSRRQFENYEPIEKVHVH        |
| KC175340_CCoV2_US,NY_K378        | CGCIGCLGSCCHSICSRRQFESYEPIEKVHVH        |
| KC175341_CCoV2_US,NY_S378        | CGCIGCLGSCCHSICSRRQFESYEPIEKVHVH        |
| JQ404410_CCoV2_US,GA_UGA-TN449   | CGCIGCLGSCCHSICSRRQFENYEPIEKVHVH        |
| JQ404409_CCoV2_US,GA_UGA-1-71    | CGCIGCLGSCCHSICSRRQFESYEPIEKVHVH        |
| KY063616_CCoV2_China_HLJ071      | CGCIGCLGSCCHSICSRRQFENYEPIEKVHVH        |
| KY063617_CCoV2_China_HLJ072      | CGCIGCLGSCCHSICSRRQFENYEPIEKVHVH        |
| KY063618_CCoV2_China_HLJ073      | CGCIGCLGSCCHSICSRRQFENYEPIEKVHVH        |
| GQ477367_CCoV2_Taiwan_NTU336     | CGCIGCLGSCCHSICSRRQFENYEPIEKVHVH        |
| GQ152141_FCoV2_Taiwan_NTU156     | CGCIGCLGSCCHSICSRRQFENYEPIEKVHVH        |
| JQ408981_FCoV2_Hungary_DF2       | CGCIGCLGSCCHSICSRRQFYYEPIEKVHVH         |
| JN634064_FCoV2_WSU79-1683        | CGCIGCLGSCCHSMCSRRQFENYEPIEKVHVH        |
| <b>DQ010921_FCoV2_WSU79-1146</b> | <b>CGCIGCLGSCCHSICSRRQFENYEPIEKVHVH</b> |
|                                  | *****: ** **** *****                    |

## B

### Summary of Amino Acid (AA) Sequence Identity and Similarity between CCoV2 and FCoV2

|                           | NTD          | RBD   | CTD<br>(KRK) | CTD<br>(KRKYR) | S1<br>(KRK) | S1<br>(KRKYR) | S2<br>(KRK) | S2<br>(KRKYR) |
|---------------------------|--------------|-------|--------------|----------------|-------------|---------------|-------------|---------------|
| Total No. of AA           | 390          | 268   | 267          | 269            | 960         | 962           | 493         | 491           |
| No. of AA with Identity   | 127          | 235   | 246          | 247            | 637         | 638           | 464         | 463           |
| No. of AA with Similarity | 229          | 257   | 264          | 265            | 782         | 783           | 485         | 484           |
| % Identity                | 32.6%        | 87.7% | 92.1%        | 91.8%          | 66.3 %      | 66.3%         | 94.1%       | 94.3%         |
| % Similarity              | <b>58.7%</b> | 95.9% | <b>98.9%</b> | 98.5%          | 81.6%       | 81.4%         | 98.4 %      | <b>98.6%</b>  |

**Figure S9. Two CCoV1 Spike Sequences *versus* 10 FCoV1 Spike Sequences**

**A**

|                                | Signal Peptide                                                                        |
|--------------------------------|---------------------------------------------------------------------------------------|
| KP849472.1_CCoV1_Italy-23/03   | <b>MKIVLFITLLSVVSC</b> DEESYEAPNDNPAKFNIS-SNSRFEANMYNFLQTWDIPPGETETS                  |
| AY307020.1_CCoV1_Elmo/02       | <b>MKIFLLSALLAIANCKDE</b> ---AGPFDDPQHFNSTFSNQRFASMYNFLKSWNIPPDTETI                   |
| AAB47503_FCoV1_KU-2            | -- <b>MIFIILTLTLLSVAKS</b> EDA----PHGVTLPQFNSTSHNNERFELNFYNFLQTWDIPPNTETI             |
| KX722530_FCoV1_Dutch_cat2      | -- <b>MILLILALLSTAKS</b> EDA----PHGVTLPYFNSTSYDNKFKELNFYNFLQTWDIPPNTETI               |
| KX722529_FCoV1_Belgium_UG-FH8  | -- <b>MILLLLAILLSIAK</b> CDDA----PNGAILPHFNSTSYNNAKFELNFYNFLQTWNIPPNTETI              |
| KP143512_FCoV1_UK26M           | -- <b>MILLLVLF</b> SVVGAHDA----PHGVTLPQFNSTSYNNDKFELNFYNFLQTWDIPPNTETI                |
| MG893511_FCoV1_Germany_Felix   | -- <b>MIVLIFAILLSTALS</b> EDA----PQGVTLPPQFNSTSYDNKFKELSFYNFLQTWDIPPNTETI             |
| KY566209_FCoV1_China10         | -- <b>MILLLLAFFSVVKS</b> QDA----PHGVTLPQFNSTSHNNDKFELNLFNFLTWDIPPGETETI               |
| FJ938054_FCoV1_Utrecht_UU4     | -- <b>MILLLALLS</b> IASSEDA----PHGVTLPHFNTSHNNSKFELNFYNFLQTWDIPPNTETI                 |
| DQ848678_FCoV1_C1Je_Kitten_FIP | -- <b>MILLLLAFSVVSS</b> SRDT----PYRVTLPPQFNSTSHNNDKFELNLFNFLTWDIPPSTETI               |
| EU186072_FCoV1_Black           | -- <b>MIVLIFALLSTARS</b> EDA----PHGVTLPQFNSTSSNNQKFELNFYNFLQTWDIPPNTETI               |
| <b>AB088222_FCoV1_UCD1</b>     | -- <b>MILLIFALFSVVRSEDA</b> ---- <b>PHGVTLPHFNTSYNNPKFELNFYNFLQTWDIPPNTETI</b>        |
|                                | : : : : . : : : * * * . * : * * : : * * : : * * * * * *                               |
|                                | NTD / S1                                                                              |
| KP849472.1_CCoV1_Italy-23/03   | FGRVIYHYCQGSVNSNTDCAWYNLRWQPG---SGFKEKFLSSAGLGITNVHGIFYFDVREH                         |
| AY307020.1_CCoV1_Elmo/02       | LGGYL-PYCGS----SQRCGWINLLGSDKPNANNKKIQYFDSVSMGITDVHGVYFDVREH                          |
| AAB47503_FCoV1_KU-2            | LGGYL-PYCGA----GVNCGWYNFS--QSVG-QNGKYAYINTQNLNIPNVHGVYFDVREH                          |
| KX722530_FCoV1_Dutch_cat2      | LGGYL-PYCGN----GVNCGWYNFVYGRPVG-SNGKYAYINTQNLNIPNVHGVYFDVREH                          |
| KX722529_FCoV1_Belgium_UG-FH8  | LGGYL-PYCGR----GDNCGWYNFVYQSQQG-TYAKYKINTEY-LIPNVHGVYFDVREY                           |
| KP143512_FCoV1_UK26M           | LGGYL-PYCGT----GANCGWYNFVYQQNVG-SNGKYSYINTQNLNIPNVHGVYFDVREH                          |
| MG893511_FCoV1_Germany_Felix   | LGGYL-PYCGK----GLNCGWYNFVYQQPVT--DAKYSYINTQNLNIPNVHGVYFDVREH                          |
| KY566209_FCoV1_China10         | LGGYL-PYCGV----GNNCGWYNFVFSQNVG-SNGKYSYINTQNLNIPNVHGVYFDVREH                          |
| FJ938054_FCoV1_Utrecht_UU4     | LGGYL-PYCDH----EDNCGWYNFVYNKVG-PNAKYSYINTQNLNIPNVHGVYFDVREH                           |
| DQ848678_FCoV1_C1Je_Kitten_FIP | LGGYL-PYCGI----GDNCGWYNFVYKQHDD-IEAKYSYINTQNLNIPNVHGVYFDVREH                          |
| EU186072_FCoV1_Black           | LGGYL-PYCGD----GPNCGWYNFVYSQNVG-QNGRHSYINTKLNIPNVHGVYFDVREH                           |
| <b>AB088222_FCoV1_UCD1</b>     | <b>LGGYL-PYCRT</b> ---- <b>GQNCGWYNFVYNHAV</b> -- <b>QNAKYSYINTQNLNIPNVHGVYFDVREH</b> |
|                                | : * : * * * * . * . * : : : : * : * * . * * * * :                                     |
| KP849472.1_CCoV1_Italy-23/03   | D-ENNRWETWDRVGLAVTIYGYSSYDLFMILEDGFSDDSLSIIVKICHWTSGNST---SL                          |
| AY307020.1_CCoV1_Elmo/02       | AADNNQWDDQERVGLAIVYGYSSWYDLYMLHGNNVESGSLSVSVKICHWTHGSINDTKWY                          |
| AAB47503_FCoV1_KU-2            | --NNDGEWDDRDKVGLLLIAIHGNSKYSLLMVLQDAVEANQPHVAVKICHWK--PGNI---S                        |
| KX722530_FCoV1_Dutch_cat2      | --NSDGVWDTDRVGLLLIAIHGSAHYSLLMVLQDSVEENQPHFAVKICHWK--PGNI---S                         |
| KX722529_FCoV1_Belgium_UG-FH8  | GNSDGAWTDMDKVGLLLIAIHGTSHYSLLMVLQDRVEENKPHVAVKICHWK--PGNI---S                         |
| KP143512_FCoV1_UK26M           | --NSDGVWDPDRVGLLLIAIHGKSQYSLLMVLQDNVEENQPHVAVKICHWK--PGNI---S                         |
| MG893511_FCoV1_Germany_Felix   | --DADGVWETDRVGLLLIAIHGTSHYSLLMVLQDGVEENQPHVAVKICHWK--PGNI---S                         |
| KY566209_FCoV1_China10         | --NSDGLWDERDRVGLLLSVHGHKSHYSLLMVLQDAVEANAPDVAVKICNWOHLTGNI---S                        |
| FJ938054_FCoV1_Utrecht_UU4     | --NSDGVWDQIDRVGLLLIAIHGTSHYSLLMVLQDGVEASQPHVAVKICHWN--PGNI---S                        |
| DQ848678_FCoV1_C1Je_Kitten_FIP | --DSDGVWDQDKVGLLLIAIHGNSHYSLLMVLQDGVEDNQPHVAVKICHWK--PSNI---S                         |
| EU186072_FCoV1_Black           | --NSDGLWDARDRVGLLLIAIYGTSYYSLLMVLQDKVEENQPHVAVKICHWK--PGNI---S                        |
| <b>AB088222_FCoV1_UCD1</b>     | -- <b>NSDGVWDTDRVGLLLIAIHGESHSYLLMVLQDNVEENQPHVAVKICHWQ</b> -- <b>LGNI</b> ---S       |
|                                | : * : : * * : : * : * . * : : . : : * * . *                                           |
| KP849472.1_CCoV1_Italy-23/03   | GGNRYNLHIGDTSDCVFNHRFALDSKLITTDIYGFQWTETYINIYLGGTISRVIDNTWD                           |
| AY307020.1_CCoV1_Elmo/02       | ESNRWDLSQLGTVDPCKFNHQFALDTKLITSDFYGFQWTNTYVNIYLGGTISRVIENTWD                          |
| AAB47503_FCoV1_KU-2            | SYHAFSVNLGDGGQCQVFNQRFSLDTVLTNDYFGFQWTDYVDIYLGGTITKVWVDNDWS                           |
| KX722530_FCoV1_Dutch_cat2      | SYHQFNVVEFGDGGQCQVFNRRFSLDTVLTNDYFGFQWTDYVDIYLGGTITKVWIANDWS                          |
| KX722529_FCoV1_Belgium_UG-FH8  | SYHQFGVDLGDGGQCQVFNRRFSLDTKLITNDYFGFQWTDYVDIYLGGTITKVWIDNDWS                          |
| KP143512_FCoV1_UK26M           | SIHQFSVNLGDGGQCQVFNQRFSLDTILTNDYFGFQWTNNYVNIYLGGTITKVWVENDWS                          |
| MG893511_FCoV1_Germany_Felix   | SYHSFTIDFGDGGQCQVFNQRFSLDTKLITNDYFGFQWTNTYVDIYLGGTITKVWVANDWS                         |
| KY566209_FCoV1_China10         | IYHKWSASLGDGGQCQVFNRRFSLDTVLTANDYFGFQWTDYVDIYLSGTVTKVWIENDWN                          |
| FJ938054_FCoV1_Utrecht_UU4     | TYHQFDVNLGDGGQCQVFNQRFSLDTVLTANDYFGFQWTDYVDIYLGGTITKVWVNDWS                           |
| DQ848678_FCoV1_C1Je_Kitten_FIP | SYHQFNVNLGDVGVCVFNRRFSLDTVLTNDYFGFQWTDYVDIYLGGTITKVWVIGNDWS                           |
| EU186072_FCoV1_Black           | SYHQFVSNLEDGGQCQVFNQRF--DVTLTANDYFGFQWTDYVDIYLGGTITKVWVNDWS                           |
| <b>AB088222_FCoV1_UCD1</b>     | <b>SYHQFNLLNLGDGGQCQVFNQRFSLDTVLTANDYFGFQWTDYVDIYLGGTITKVWVDNDWS</b>                  |
|                                | . : * * * : * : * : : * * * * * : * * * * * : * *                                     |

KP849472.1\_CCoV1\_Italy-23/03  
AY307020.1\_CCoV1\_Elmo/02  
AAB47503\_FCoV1\_KU-2  
KX722530\_FCoV1\_Dutch\_cat2  
KX722529\_FCoV1\_Belgium\_UG-FH8  
KP143512\_FCoV1\_UK26M  
MG893511\_FCoV1\_Germany\_Felix  
KY566209\_FCoV1\_China10  
FJ938054\_FCoV1\_Utrecht\_UU4  
DQ848678\_FCoV1\_C1Je\_Kitten\_FIP  
EU186072\_FCoV1\_Black  
**AB088222\_FCoV1\_UCD1**

KVDVKISSNWNNAKTNYGYVQFVNKTTYTYNNTGGTGVNQLQLGLCEDDFCAGYVTNVF  
KVQVKMSPFWSS-LTYGYYFQLVNRTTYIYNNTGGDDVEQLQLIECKNEFCAGFSKNVF  
IVEASISYHWN-INYGYMQFVNRTTYAYNNTGGANYTQLQLSECHTDYCYAGYAKNVF  
VVESSISYHWNQ-LNYGYIQQFVNRTTYIYNNTGGSNYTHLRLSECHGAYCAGYAKNVF  
VVESSISYHWNQ-LNYGYIQQFVNRTTYAYNSTGGSNYTHLQLSECHSEYCYAGYAKNVF  
VVESSISYHWSQ-INYGYMQFVNRTTYVYNNTGGANYTHLQLEECHSEYCYAGYAKNVF  
VVEASISYHWN-INYGYIQQFVNRTTYTYNNTGGMNYTHLQLEECTSDYCYAGYAKNVF  
VVEASISYHWN-INYGYIQQFVNRTTYAYNSTAGSNYTHLQLKECHSDYCYAGYAKNVF  
VVEASISSHWN-LNYGYIQQFVNRTTYAYNSTGGSNYTHLQLTECHTDYCYAGYAKNVF  
IVEASISYHWNQ-LNYGYIQQFVNRTTYTYNSTAGSNYTHLQLAECTSEYCYAGYAKNVF  
SVEASISYHWNQ-LNYGYIQQFVNRTTYTYNNTGGSNYTHLQLAECTSEYCYAGYAKNVF  
**VVEASISYHWSR-LNYGYMQFVNRTTYIYNNTGGSNYTHLQLQECHSDYCYAGYAKNVF**  
\*: :.\* . \*\*\*.\*:\*\*\*:\* \*\*.\* :\*: \* :\*\*\*: .\*\*\*

KP849472.1\_CCoV1\_Italy-23/03  
AY307020.1\_CCoV1\_Elmo/02  
AAB47503\_FCoV1\_KU-2  
KX722530\_FCoV1\_Dutch\_cat2  
KX722529\_FCoV1\_Belgium\_UG-FH8  
KP143512\_FCoV1\_UK26M  
MG893511\_FCoV1\_Germany\_Felix  
KY566209\_FCoV1\_China10  
FJ938054\_FCoV1\_Utrecht\_UU4  
DQ848678\_FCoV1\_C1Je\_Kitten\_FIP  
EU186072\_FCoV1\_Black  
**AB088222\_FCoV1\_UCD1**

TPVNGKIPGDFSFNWFLSDKSTIVQGRVSSQPVYVECLRPVPSWSNNSAIVSFDNDT  
TPVNGKIPEDFSFNWFLSDKSTIVQGRVRSQPVYVECLRPVPSWSNNSAIVSFDNDT  
VPIDGKIPEDFSFNWFLSDKSTLVQGRVLSQPVFVQCLRPVPSWSNNTAVVHFKNDA  
VPIDGKIPESFSFNWFLSDKSTLVQGRILSKQPVFVQCLRPVPLWSNNSAVVYFKNDA  
VPIEGKIPESFSFNWFLSDKSTLVQGRVLSKQPVFVQCLRPVPSWSNNTAVVLFNTDS  
VPIDGKIPGDFSFNWFLSDKSTLVQGRVLSKQPVFVQCLRAVPSWSNNSAVVHFSNDD  
VPVDGKIPESFSFNWFLSDKSTLVQGRVLSKQPVFVQCLRPVPSWSNNSAVVYFTNDS  
VPIDGKIPESFSFNWFLSDKSTLVQGRVLSRQPVFVQCLRPVPTWSNNSAVVYFKNDA  
VPIDGKIPGDFSFNWFLSDKSTLVQGRVLSQPVFVQCLRPVPTWSNNTAVVHFKNDA  
VPIDGKIPESFSFNWFLSDKSTLVQGRVLSKQPVFVHCLRPVPSWSNNSAVVHFSDDP  
VPIDGKIPESFSFNWFLSDKSTLVQGRVLSRQPVLVQCLRPVPTWSNNSAVVHFSNDL  
**VPIDGKIPESFSFNWFLSDKSTLVQGRVLSQPVFVQCLRPVPTLSNNTAVVHFNDV**  
.\*:\*\*\*\* \*\*.\*\*\*\*\*:\*\*\*\*:\*\*\*\*: \*\* \*.\* \*\* \*\* \*.:\*: \* \*

KP849472.1\_CCoV1\_Italy-23/03  
AY307020.1\_CCoV1\_Elmo/02  
AAB47503\_FCoV1\_KU-2  
KX722530\_FCoV1\_Dutch\_cat2  
KX722529\_FCoV1\_Belgium\_UG-FH8  
KP143512\_FCoV1\_UK26M  
MG893511\_FCoV1\_Germany\_Felix  
KY566209\_FCoV1\_China10  
FJ938054\_FCoV1\_Utrecht\_UU4  
DQ848678\_FCoV1\_C1Je\_Kitten\_FIP  
EU186072\_FCoV1\_Black  
**AB088222\_FCoV1\_UCD1**

FPCQASADVLRFLNLFSGEVFHPNATADDQIIFTFEDNSTAEISCYNGANVTDPTIGFNT  
FPCQASADVLRFLNLFSGEVFHPNATADDQIIFTFEDNSTAEISCYNGANVTDPTVGFNT  
FCPNVADVLRFLNLFSDTDVYTDSTNDEQLFFTFEDNTTASIACYSSANVTDQFANN  
FCHNVTDVLRFLNLFSDTDIYIESTKDDQLHFTFEDNTTASIACYSSANVTDQFANN  
YCPNVADVLRFLNLFSDTDVYTESTNDDQLYFTFEDNTTASIACYSSANVTDQFANN  
FCPNVTAELVLRFLNLFSDTDVYVASNSDDRLYFTFEDNTTAGVACYSSANITDYKPNNA  
FCPNVADVLRFLNLFSDTDVYTNNSNDEQLYFTFEDNTTASIACYSSANVTDQFANN  
FCPNVADVLRFLNLFSDTDVYTESTNDDQLYFTFEDNTTASIACYSSANVTDQFANN  
FCPNVADVLRFLNLFSDTDVYTESTNDDQLHFTFEDNTTASITCYSSANVTDNQPASGS  
FCPGVTAELVLRFLNLFSDTDVYTESTSDQLHFTFEDNTTASIACYSSANVTDNQPDNT  
YCPGVTAELVLRFLNLFSDTDVYTDLTNDQFYFTFEDNTTASIACYSSANVTDQFANN  
**FCPNVADVLRFLNLFSDTDVYTA-NDQLYFTFEDNTTASIACYSSANVTDNQPANNS**  
:\* .:.\*:\*\*\*\*\* \*\* .: . :.: \*\*\*\*\*:.\* :\*:.\* \*.\*

NTD ←

KP849472.1\_CCoV1\_Italy-23/03  
AY307020.1\_CCoV1\_Elmo/02  
AAB47503\_FCoV1\_KU-2  
KX722530\_FCoV1\_Dutch\_cat2  
KX722529\_FCoV1\_Belgium\_UG-FH8  
KP143512\_FCoV1\_UK26M  
MG893511\_FCoV1\_Germany\_Felix  
KY566209\_FCoV1\_China10  
FJ938054\_FCoV1\_Utrecht\_UU4  
DQ848678\_FCoV1\_C1Je\_Kitten\_FIP  
EU186072\_FCoV1\_Black  
**AB088222\_FCoV1\_UCD1**

TSQIPFGGTADPYLCFVNFAALDNQFLGILPPTIREMAFGRDGSIFVNGYKYFSLPPI  
TSQIPFGSTDDPYLCFANFSTAALDNQFLGILPPTVREMAFGRDGSIFVNGYKYFSLPPI  
VSHIPFGKT--AHFCFANFSSHVSQRQFLGILPPTVREFAFGRDGSIFVNGYKYFSLPAI  
VSHIPFGKT--AYFCFATFSSHVSQRQFLGILPPTVREFAFGRDGSIFVNGYKYFSLPPI  
ASHIPFGKTMHSYFCFANFSSHVSQRQFLGILPPTVREFAFGRDGSIFVNGYKYFSLPPI  
SAQIPFGKTHSYFCFANFSSSHV-TQFLGILPPTVREFAFGRDGSIFVNGYKYFSLPPI  
NSHIPFGTTAQSYFCFANFSSNAVARQFLGILPPTVREFAFGRDGSIFVNGYKYFSLPPI  
VSHVPFGKTEHSYFCFANFSSHVSQRQFLGILPPTVREFAFGRDGSIFVNGYKYFSLPPI  
ISHTPFVS--NSYLCFANFSSHVSQRQFLGILPPTVREFAFGRDGSIFVNGYKYFSLQPI  
LSDIPFGKITHSYLCFANFSSNAPVSMQFLGILPPTVREFAFGRDGSIFVNGYKYFSFPPI  
VSHIPLGKTRHSYFCFANFSSHVSQRQFLGILPPTVREFAFGRDGSIFVNGYKYFSLPPI  
**TSHIPFGKTMHSYFCFANFSSNS-MVRQFLGILPPTVREFAFGRDGSIFVNGYKYFSLPPI**  
.. \*: :\*\*\*\*.\* : : \*.\*\*\*\*\* :\*:\*\*\*:\*\*\*:\*.\*\*\*\*\*: \*

Proposed RBD / S1

KP849472.1\_CCoV1\_Italy-23/03  
AY307020.1\_CCoV1\_Elmo/02  
AAB47503\_FCoV1\_KU-2  
KX722530\_FCoV1\_Dutch\_cat2  
KX722529\_FCoV1\_Belgium\_UG-FH8  
KP143512\_FCoV1\_UK26M  
MG893511\_FCoV1\_Germany\_Felix  
KY566209\_FCoV1\_China10  
FJ938054\_FCoV1\_Utrecht\_UU4  
DQ848678\_FCoV1\_C1Je\_Kitten\_FIP  
EU186072\_FCoV1\_Black  
**AB088222\_FCoV1\_UCD1**

KSINFAISAVEYYGFWTIAYTKYTDVMVDVNGTSITRLFYCDSPINRIKCQQLKHELDPG  
KSINFAISAVEYYGFWTIAYTKYTDVMVDVNGTSITRLFYCDSPINRIKCQQLKHELDPG  
RSVNFSISSVEEYGFWTIAYTNYTDVMVDVNGTAITRLFYCDSPINRIKCQQLKHELDPG  
KSVNFSISSVEYQGFWTIAYTNYTDVMVDVNGTGITRLFYCDSPINRIKCQQLKHELDPG  
KSVNFSISSVEYQGFWTIAYTNYTDVMVDVNGTVITRLFYCDSPINRIKCQQLKHELDPG  
KSVNFSISSVENFGFWTIAYTNYTDVMVDVNGTGITRLFYCDSPINRIKCQQLKHELDPG  
KSVNFSISSIQRGFWTIAYTNYTDVMVDVNGTGITRLFYCDSPINRIKCQQLKHELDPG  
KSVNFSISSVEYQGFWTIAYTNYTDVMVDVNGTSITRLFYCDSPINRIKCQQLKHELDPG  
KSVNFSISSVENYGFWTIAYTNYTDVMVDVNGTVITRLFYCDSPINRIKCQQLKHELDPG  
KSVNFSISSVENYGSWTIAYTNYTDVMVDVNGTGITRLFYCDSPINRIKCQQLKHELDPG  
KSVNFSISSVEYQGFWTIAYTNYTDVMVDVNGTGISRLFYCDSPINRIKCQQLKHELDPG  
**KSVNFSIGSVEQHGFWTIAYTNYTDVMVDVNGTGITRLFYCDSPINRIKCQQLKHELDPG**  
\*:\*\*\*:\*.:.: . \* \*\*\*\*\*:\*\*\*\*\*:\*\*\* \*.\* \*\* \*.\* \*\* \*.\*

RBD  
55T  
27I  
42S

60T  
39I  
53S

|                                |                                                                      |            |
|--------------------------------|----------------------------------------------------------------------|------------|
| KP849472.1_CCoV1_Italy-23/03   | FYSANSLVKKNLPKTFVTTPOFYNGMNVTLHVILNDTSAGTKVVGFFERYELEQIADILFE        |            |
| AY307020.1_CCoV1_Elmo/02       | FYSANSLVKKDLPKTFVTTPOFYNNMNVTLHVILNDTEADYKVVGFFERYELEKIADIHFE        |            |
| AAB47503_FCoV1_KU-2            | FYSASMLVKKDLPKTFVTMPQFYHWMNVTLHVVLNDTEKKYDIIILAKAPELAALADVHFE        |            |
| KX722530_FCoV1_Dutch_cat2      | FYSASMLVKKDLPKTFVTMPQFYNNMNVTLHVVLNDTEKKPDIIILAKAPELASLADIHFE        |            |
| KX722529_FCoV1_Belgium_UG-FH8  | FYSASMLVKKDLPKTFVTMPQFYNNMNVTLHVVLNDTEKKQDIIILAKASELASLADIHFE        |            |
| KP143512_FCoV1_UK26M           | FYSASMLVKKDLPKTFVTMPQFYNNMNVTLHVVLNDTEKKADIIILAKASELASLADVHFE        |            |
| MG893511_FCoV1_Germany_Felix   | FYSASTLVKKDLPKTFVTMPQFYNNMNVTLHVVLNDTQKGANIIILSKAAELASLADIHFE        |            |
| KY566209_FCoV1_China10         | FYSASTLVKKDLPKTFVTMPQFYNNMNVTLHVVLNDTEKKEDIIILAKAPELLSLADIHFE        |            |
| FJ938054_FCoV1_Utrecht_UU4     | FYSASMLVKKDLPKTFVTMPQFYNNMNVTLHVVLNDIEKKADIIILAGAPELASLADIHFE        |            |
| DQ848678_FCoV1_C1Je_Kitten_FIP | FYSASALVKKDLPKTFVIMPQFYNNMNVTLHVVLNDTAKGADIIILAKAPELASLADVHFE        | <b>RBD</b> |
| EU186072_FCoV1_Black           | FYSASMLVKNLDPKTFVTMPQFYNNMHITLHVVLNDTAKKEDIIILAKAPELASLADVHFE        | <b>60T</b> |
| <b>AB088222_FCoV1_UCD1</b>     | <b>FYAASMLVKKDLPKTFVTMPQFYNNMTVTLHVVLNDTEKKADIIILAKAPELASLADIHFE</b> | <b>30I</b> |
|                                | ***.:. ***.:***** ****. * :****:*** . : ** :*: **                    | <b>41S</b> |

|                                |                                                                      |            |
|--------------------------------|----------------------------------------------------------------------|------------|
| KP849472.1_CCoV1_Italy-23/03   | IPQNQDGEVKNVTNFCVQTRQLAFFFKYTSLQGLYSISNTVWLKNYDCFPSPQQFNYYLQ         |            |
| AY307020.1_CCoV1_Elmo/02       | IPQDKNGGVKNVTNFCVQTRQLAFFFKYTSLQGLYSISNTVWLKNYDCFPSPQQFNYYLQ         |            |
| AAB47503_FCoV1_KU-2            | IAQA-NGSVTNVTSLCVQARQLALFYKYTSLQGLYTYSNLVELQNYDCFPSPQQFNYYLQ         |            |
| KX722530_FCoV1_Dutch_cat2      | VAQS-NGSVTNVTSICVQTRQLALFYKYTSLQGLYTYSNLVELQNYDCFPSPQQFNYYLQ         |            |
| KX722529_FCoV1_Belgium_UG-FH8  | IAQA-NGSVTNVTSLCIQARQLALFYKYTSLQGLYTYSNLVEVQNHDCFPSPQQFNYYLQ         |            |
| KP143512_FCoV1_UK26M           | IAQA-NGSVVNATSLCVQTRQLALFYKYTSLQGLYTYSNLVELQNYDCFPSPHQFNYYLQ         |            |
| MG893511_FCoV1_Germany_Felix   | IDRA-DGSVTNVTSLCVQTRQLALFYKYTSLQGLYTYSNLVELQNYDCFPSPQQFNYYLQ         |            |
| KY566209_FCoV1_China10         | IAQA-NGSVTNVTSVCVQARQVALFYKYTSLQGLYTYSNLVELQNYDCFPSPQQFNYYLQ         |            |
| FJ938054_FCoV1_Utrecht_UU4     | IAQA-NGSVVNVTSLCVQARQLALFYKYTSLQGLYTYSNLQNYDCFPSPQQFNYYLQ            |            |
| DQ848678_FCoV1_C1Je_Kitten_FIP | IAQA-NGSVANLTSLCVQTRQLALFYKYTSLQGLYTYSNLIELQNYDCFPSPQQFNYYLQ         | <b>RBD</b> |
| EU186072_FCoV1_Black           | ILQA-NGSVVNVTSLCVQAKQLALFYKYTSLQGLYTYSNLVELQNYDCFPSPQHFNNYYLQ        | <b>60T</b> |
| <b>AB088222_FCoV1_UCD1</b>     | <b>IVQA-NGSVANVTSLCVQTRQIALFYKYTSLSQSLYTYSNLVELQNYDCFPSPQQFNYYLQ</b> | <b>32I</b> |
|                                | : : :* * * * ..*:*:*:*:*****.**: * : :*:*****:*****                  | <b>51S</b> |

|                                |                                                                        |            |
|--------------------------------|------------------------------------------------------------------------|------------|
| KP849472.1_CCoV1_Italy-23/03   | FETLCFDTNPSVAGCKWAVMHSPWIWNTQFATITVTYKEGAQITTMPK-PQLGFRDVSFKV          |            |
| AY307020.1_CCoV1_Elmo/02       | FETLCFDTNPSVAGCKWAIMHSPWIWNTQFATITVTYKDGAAQITTMPK-PQLGFRDISFKV         |            |
| AAB47503_FCoV1_KU-2            | FETLCFDVNPVAVAGCKWSLVHDVQWRTQFATITVSYKHGSMITTHAKGHSWGFGQDTSVLV         |            |
| KX722530_FCoV1_Dutch_cat2      | FETLCFDVNPVAVAGCKWSLVHDTRWRTQFATITVSYKEGSMITTMPK-SQLGFGDISVLV          |            |
| KX722529_FCoV1_Belgium_UG-FH8  | FETLCFDVNPVAVAGCKWSLVHDNIWRTQFATITVSYKEGAMITTMPK-AQLGFGDISVLV          |            |
| KP143512_FCoV1_UK26M           | FETLCFDTSPVAVAGCKWSLVHDVWRWRTQFATITISYKDGAKITTMPK-AKLGFQDISNIV         |            |
| MG893511_FCoV1_Germany_Felix   | FETLCFDVNPVAVAGCKWSLVHDSIWHRTQFATITVSYKEGARITTMPK-AQIGFGDISNLV         |            |
| KY566209_FCoV1_China10         | FETLCFDVSPVAVAGCKWSLVHDNKWRTQFATITVSYKEGSMITTMPK-PQLGFGDISNLV          |            |
| FJ938054_FCoV1_Utrecht_UU4     | FETLCFDVSPVAVAGCKWSLVHDVWKWRTQFATITVSYKDGAMITTMPK-AQLGFGDISNIV         |            |
| DQ848678_FCoV1_C1Je_Kitten_FIP | FETLCFDVSPVAVAGCKWALVHDYNWRTQFATITVSYKEGAMITTMPK-AQLGFGDISKL           | <b>RBD</b> |
| EU186072_FCoV1_Black           | FETLCFDVNPVAVAGCKWSLVHDVNWRTQFATITVSYKDGAMITTMPK-AQLGFGDISNLV          | <b>46T</b> |
| <b>AB088222_FCoV1_UCD1</b>     | <b>FETLCCLDTNPVAVAGCKWALVHDVWKWRTQFATITVSYKDGAMITTMPK-AQLGFGDISNLV</b> | <b>28I</b> |
|                                | *****:..* *****:..* .*****:..*.*: * * . **:* * *                       | <b>40S</b> |

**Proposed RBD**

RBD Total (T): 281 aa

Identity (I): 156 / 281 = 55.5%

Similarity (S): 227 / 281 = 80.8%

|                                |                                                                        |  |
|--------------------------------|------------------------------------------------------------------------|--|
| KP849472.1_CCoV1_Italy-23/03   | EGECTDYNIIYGFQGTGIIIRKTESKLVAGLFYTSASGDLLAFKNSTTGEIFTVVPCLDLTAQ        |  |
| AY307020.1_CCoV1_Elmo/02       | EGECTDYNIIYGFQGTGIIIRKTESKLVAGLFYTSASGDLLAFKNSTTGEIFTVVPCLDLTAQ        |  |
| AAB47503_FCoV1_KU-2            | KDECTDYNIIYGFQGTGIIIRNTTSRLVAGLYYTSISGDLLAFKNSTTGEIFTVVPCLDLTAQ        |  |
| KX722530_FCoV1_Dutch_cat2      | KDECTDYNIIYGFQGTGIIIRNTTSRLVAGLYYTSISGDLLAFKNSTTGEIFTVVPCLDLTAQ        |  |
| KX722529_FCoV1_Belgium_UG-FH8  | KDECTDYNIIYGFQGTGIIIRNTTSRLVAGLYYTSISGDLLAFKNSTTGEIFTVVPCLDLTAQ        |  |
| KP143512_FCoV1_UK26M           | KDECTDYNIIYGFQGTGIIIRNTTTRIVAGLYYTSIIIGDLLAFKNSTTGEIFTVVPCLDLTAQ       |  |
| MG893511_FCoV1_Germany_Felix   | KDECTDYNIIYGFHGTGIIIRPTTSRLVAGLYYTSISGDLLAFKNSTTGEIFTVVPCLDLTAQ        |  |
| KY566209_FCoV1_China10         | KDECTDYNIIYGFQGTGIIIRNTTSRLVAGLYYTSISGDLLAFKNSTTGEIFTVVPCLDLTAQ        |  |
| FJ938054_FCoV1_Utrecht_UU4     | KDECTDYNIIYGFQGTGIIIRNTTSRLVAGLYYTSASGDLLGFKISTTGEIFTVVPCLDLTAQ        |  |
| DQ848678_FCoV1_C1Je_Kitten_FIP | KDECTDYNIIYGFQGTGIIIRKTTTSRLVAGLYYTSISGDLLAFKNSTTGEIFTVVPCLDLTAQ       |  |
| EU186072_FCoV1_Black           | KDECTDYNIIYGFQGTGIIIRSTTSRLVAGLYYTSISGDLLAFKNSTTGEIFTVVPCLDLTVL        |  |
| <b>AB088222_FCoV1_UCD1</b>     | <b>KDECTDYNIIYGFHGTGIIIRNTTSRLVAGLYYTSISGDLLAFKNSTTGEIFTVVPCLDLTAQ</b> |  |
|                                | : *****:***:* * ::*:***:*** ****.* * ***** * * *                       |  |

→ CTD / S1



KP849472.1\_CCoV1\_Italy-23/03  
AY307020.1\_CCoV1\_Elmo/02  
AAB47503\_FCoV1\_KU-2  
KX722530\_FCoV1\_Dutch\_cat2  
KX722529\_FCoV1\_Belgium\_UG-FH8  
KP143512\_FCoV1\_UK26M  
MG893511\_FCoV1\_Germany\_Felix  
KY566209\_FCoV1\_China10  
FJ938054\_FCoV1\_Utrecht\_UU4  
DQ848678\_FCoV1\_C1Je\_Kitten\_FIP  
EU186072\_FCoV1\_Black  
AB088222\_FCoV1\_UCD1

AAVINDEIVGAITSINQTDLFEFVNHTHTV**RRVRR**AVQTGTTITAYSMPQFYYITKWNND  
AAVINDEIVGAITSINQTDLFEFVNHTHTV**RRARR**AVQTGTTITAYSMPQFYYITKWNND  
VAVINDEIVGAITAVNQTDLFEFVNNTQ**ARRSR**---STPNFVTSYTMPQFYYITKWNND  
AAVINDEIVGVITSVNQTDLFEFVNHTST**RRSRI**--AAVPQAATYTMPQFYYITKWNND  
AAVINDEIVGAITAVNQTDLFEFVNHTQV**KRLRR**--S-TPETVQTYTMPQFYYITKWNND  
AAVINDEIVGVITAVNQTDLFEFVNHTQ**RGARR**--STGSQTVQTYTMPQFYYITKWNND  
AAVINDEIVGAITAVNQTDLFEFVNHTSH**RRSRR**--E--VPTVQTYTMPQFYYITKWNND  
AAVINDEIVGAITAVNQTDLFEFVNHTHT**RRSRR**--S-PTEAVKTYTMPQFYYITKWNND  
AAVINDEIVGAITATNQTDLFEFVNHTWS**RSARG**--SS-PSTVNTYTMPQFYYITKWNNG  
AAVINDEIVGVITAVNQTDLFEFVNHTQ**PQRSR**--SANPTTVQTYTMSQFYYITKWNND  
AAVINDEIVGAITSVNQTDLFEFFNHTQ**KRSRR**--PT-SHSVTTYNMPQFYYITRWNNND  
AAVINDEIVGVITAVNQTDLFEFVNHTS**RRSRG**--ST-STSVTTYTMPQFYYITKWNND  
.\*\*\*\*\*.\*\*: \*\*\*\*\*.\*.\* :\*. \* \*\*\*\*\*:\*\*\*

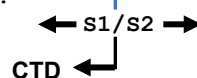

KP849472.1\_CCoV1\_Italy-23/03  
AY307020.1\_CCoV1\_Elmo/02  
AAB47503\_FCoV1\_KU-2  
KX722530\_FCoV1\_Dutch\_cat2  
KX722529\_FCoV1\_Belgium\_UG-FH8  
KP143512\_FCoV1\_UK26M  
MG893511\_FCoV1\_Germany\_Felix  
KY566209\_FCoV1\_China10  
FJ938054\_FCoV1\_Utrecht\_UU4  
DQ848678\_FCoV1\_C1Je\_Kitten\_FIP  
EU186072\_FCoV1\_Black  
AB088222\_FCoV1\_UCD1

TSENCTSVITYSSFAICNTGEIKFVNVTKEAVEDGIGTVKPISTGNITIPKNFTVAVQA  
TSENCTSVITYSSFAICNTGEIKYVNVTHVEIVDDSIGVIKPVSTGNISIPKNFTVAVQA  
TSSNCTSAITYSSFAICNTGEIKYVNVTHVEIVDDSIGVIKPVSTGNISIPKNFTVAVQA  
TSTNCTSVITYSSFAICNTGEIKYVNVTHVEV-----VVKPVSTGNITIPKNFTVAVQA  
TSTNCTSVITYSSFAICNTGEIKYVNVTKVEIVDDSIGVIKPVSTGNISIPKNFTVAVQA  
SSTNCTSVITYSSFAICNTGEIKYVNVTHVEIVDDSIGVIKPISTGNIFIPKNFTVAVQA  
TSTNCTSVITYSSFAICNTGEIKYVNVTKVEVDDSIGVIKPISSGNISIPKNFTVAVQA  
TSTNCTSVITYSSFAICNTGEIKYVNVTHVETVDDNIGVIRPISTGNISIPKNFTVAVQA  
TSSNCTSVITYSSFAICNTGEIKYVNVTHVEIVDDSVGIKPVSTGNITIPKNFTVAVQA  
TSTNCTSVITYSSFAICNTGEIKYVNVTHVETVDDSIGVIKPISTGNISIPKNFTVAVQA  
TSTNCTSVITYSSFAICNTGEIKYVNVTHVETVDD-IGVIKPISTGNILIPKNFTVAVQA  
TSTNCTSVITYSSFAICNTGEIKYV-----DDSIGVIKPISTGNISIPKNFTVAVQA  
:\* \*\*\*\* \*\*\*\*\*:\*\*\* :.:\*:\*\*\* \*\*\*\*\*

KP849472.1\_CCoV1\_Italy-23/03  
AY307020.1\_CCoV1\_Elmo/02  
AAB47503\_FCoV1\_KU-2  
KX722530\_FCoV1\_Dutch\_cat2  
KX722529\_FCoV1\_Belgium\_UG-FH8  
KP143512\_FCoV1\_UK26M  
MG893511\_FCoV1\_Germany\_Felix  
KY566209\_FCoV1\_China10  
FJ938054\_FCoV1\_Utrecht\_UU4  
DQ848678\_FCoV1\_C1Je\_Kitten\_FIP  
EU186072\_FCoV1\_Black  
AB088222\_FCoV1\_UCD1

EYIQIQVKPVVVDCAKYVCNGNHNHCLNLLTQYTSACQNIENALNLGARLESMLNEMITV  
EYIQIQVKPVVVDCAKYVCNGNHNHCLNLLTQYTSACQNIENALNLGARLESMLNEMITV  
EYIQIQVKPVVVDCAKYVCNGNTHCLNLLTQYTSACQTIENALNLGARLESMLNEMITV  
EYIQIQVKPVVVDCAKYVCNGNTHCLNLLTQYTSACQTIENALNLGARLESMLNEMITV  
EYIQIQVKPVVVDCAKYVCNGNTHCLNLLTQYTSACQTIENALNLGARLESMLNEMITV  
EYIQIQVKPVVVDCAKYVCNGNTHCLNLLTQYTSACQTIENALNLGARLESMLNEMITV  
EYIQIQVKPVVVDCAKYVCNGNTHCLNLLTQYTSACQTIENALNLGARLESMLNEMITV  
EYVQIQVKPVVVDCAKYVCNGNTHCLNLLTQYTSACQTIENALNLGARLESMLNEMITV  
EYFQIQVKPVVVDCAKYVCNGNTHCLNLLTQYTSACQTIENALNLGARLESMLNEMITV  
EYIQIQVKPVVVDCAKYVCNGNTHCLNLLTQYTSACQTIENALNLGARLESMLNEMITV  
EYIQIQVKPVVVDCAKYVCNGNTHCLNLLTQYTSACQTIENALNLGARLESMLNEMITV  
\*\*.\*\*\*\*\*\*.:\*\*\*.\*\*\*\*\* \*\* \*:\*\*\*\*\*:.\*\*:\*\*\*:\*\*\*\*\* \*\*\*:\*\*\*

#### Peptide Fusion (FP)

FP Core

KP849472.1\_CCoV1\_Italy-23/03  
AY307020.1\_CCoV1\_Elmo/02  
AAB47503\_FCoV1\_KU-2  
KX722530\_FCoV1\_Dutch\_cat2  
KX722529\_FCoV1\_Belgium\_UG-FH8  
KP143512\_FCoV1\_UK26M  
MG893511\_FCoV1\_Germany\_Felix  
KY566209\_FCoV1\_China10  
FJ938054\_FCoV1\_Utrecht\_UU4  
DQ848678\_FCoV1\_C1Je\_Kitten\_FIP  
EU186072\_FCoV1\_Black  
AB088222\_FCoV1\_UCD1

SDSSLELATIEKFNTTVVGGEKLGGIYFDGLKDVLPAPGG**RS**AIEDLLFNKVVTSGLGT  
SDSSLELATIEKFNTTVVGGEKLGGIYFDGLKDVLPAPGG**RS**AIEDLLFNKVVTSGLGT  
SDRGLELATVERFNATALGGEKLGGLYFDGLSSLLPPKIG**KRS**AVEDLLFNKVVTSGLGT  
SYRSLELATVEKFNTTVVGGEKLGGLYFDGLRALLPPTIG**KRS**AVEDLLFNKVVTSGLGT  
SDRSLELATVEKFNTTVVGGEKLGGLYFDGLSSLLPPKIG**KRS**AVEDLLFNKVVTSGLGT  
SDRSLELATVEKFNTTVLGAELGGLYFDGLRELLPPTIG**KRS**AIEDLLFNKVVTSGLGT  
SDRSLELATVEKFNTTVLGAELGGLYFDGLSSFLPPRIG**KRS**AIEDLLFNKVVTSGLGT  
SDRSLELANVEKFNTTVLGAELGGLYFDGLRELLPPTIG**KRS**AVEDLLFNKVVTSGLGT  
SDRSLEFATVDKFNNTALGGEKLGGLYFDGLSSLLPPRVGM**RS**AVEDLLFNKVVTSGLGT  
SDRSIQLATVEKFNTTVLGAELGGLYFDGLKSLPPRIG**KRS**AVEDLLFDKVVTSGLGT  
SDRSLELATIEKFNTATGGVKLGGLYFDGLSSLLPPKIGV**RS**AVEDLLFNKVVTSGLGT  
SSRSLELATVERFNATAPGGEKLGGLYFDGLSSLLPPRVG**QRS**AVEDLLFNKVVTSGLGT  
\* .::\*:::\*\* \* .. \*\*\*\* \*\*\*\*\* .\*\* \* \*\*\*:\*\*\*\*\*:\*\*\*\*\*

S2'

KP849472.1\_CCoV1\_Italy-23/03  
AY307020.1\_CCoV1\_Elmo/02  
AAB47503\_FCoV1\_KU-2  
KX722530\_FCoV1\_Dutch\_cat2  
KX722529\_FCoV1\_Belgium\_UG-FH8  
KP143512\_FCoV1\_UK26M  
MG893511\_FCoV1\_Germany\_Felix  
KY566209\_FCoV1\_China10  
FJ938054\_FCoV1\_Utrecht\_UU4  
DQ848678\_FCoV1\_C1Je\_Kitten\_FIP  
EU186072\_FCoV1\_Black  
**AB088222\_FCoV1\_UCD1**

VDE DYKKCSAGT DIADLVCAQYYNGVMVLPGVVDDNKMMY TASLIGGMAMGSITS AVAI  
VDE DYKKCSAGT DIADLVCAQYYNGVMVLPGVVDDNKMMY TASLIGGMAMGSITS AVAI  
VDD DYKKCSSGT DVADLVCAQYYNGIMVLPGVVDGNKMSMY TASLIGGMALGSITS AVAV  
VDD DYKKCSSGT DVADLVCAQYYNGIMVLPGVVDGNKMSMY TASLIGGMALGSITS AVAV  
VDD DYKKCSAGT DVADLVCAQYYNGIMVLPGVVDDNKMMY TASLIGGMAMGSITS AVAV  
VDD DYKKCSAGT DVADLVCAQYYNGIMVLPGVVDQNKMSMY TASLIGGMALGSITS AVAV  
VDD DYKKCSSG IDVADLVCAQYYNGIMVLPGVVDDNKMMY TASLIGGMAMGSITS AVAV  
VDD DYKKCSSGT DVADLVCAQYYNGIMVLPGVVDQNKMMY TASLIGGMAMGSITS AVAV  
VDD DYKKCSAGT DVADLVCAQYYNGIMVLPGVVDQNKMMY TASLIGGMALGSITS AVAV  
VDD DYKKCSAGT DVADLVCAQYYNGIMVLPGVVDQNKMMY TASLIGGMALGSITS AVAV  
VDD DYKKCSAGT DVADLVCAQYYNGIMVLPGIVDGNKMAMY TASLIGGMALGSITS AVAV  
**VDD DYKKCSAGT DVADLVCAQYYNGIMVLPGVVDGNKMMY TASLIGGMALGSITS AVAV**  
\*:\*\*\*\*\*:\* \*:\*\*\*\*\*:\*\*\*\*\*:\* \*\*\*:\*\*\*\*\*:\*\*\*\*\*:\*\*\*\*\*:

KP849472.1\_CCoV1\_Italy-23/03  
AY307020.1\_CCoV1\_Elmo/02  
AAB47503\_FCoV1\_KU-2  
KX722530\_FCoV1\_Dutch\_cat2  
KX722529\_FCoV1\_Belgium\_UG-FH8  
KP143512\_FCoV1\_UK26M  
MG893511\_FCoV1\_Germany\_Felix  
KY566209\_FCoV1\_China10  
FJ938054\_FCoV1\_Utrecht\_UU4  
DQ848678\_FCoV1\_C1Je\_Kitten\_FIP  
EU186072\_FCoV1\_Black  
**AB088222\_FCoV1\_UCD1**

PFAMQVQARLNYVALQTDVLQENQKILANAFNNAMGNITLALGQVSDAISTVSEGFNTMA  
PFAMQVQARLNYVALQTDVLQENQKILANAFNNAIGNITLALGQVSDAISTVSEGFNTMA  
PFAMQVQARLNYVALQTDVLQENQKILANAFNNAIGNITLALGKVSNAITTTSDGFNSMA  
PFAMQVQARLNYVALQTDVLQENQKILANAFNNAIGNITLALGKVSNAITTTSDGFNSMA  
PFAMQVQARLNYVALQTDVLQENQKILANAFNNAIGNITLALGKVSNAITTTSDGFNTMA  
PFAMQVQARLNYVALQTDVLQENQKILANAFNNAIGNITLALGKVSNAITTTSDGFNTMA  
PFAMQVQARLNYVALQTDVLQENQKILANAFNNAIGNITLALGKVSNAITTTSDGFNSMA  
PFAMQVQARLNYVALQTDVLQENQKILANAFNNAIGNITLALGKVSNAITTTSDGFNSMA  
PFAMQVQARLNYVALQTDVLQENQKILANAFNNAIGNITLALGKVSNAITTTSDGFNSMA  
PFAMQVQARLNYVALQTDVLQENQKILANAFNNAIGNITLALGKVSNAITTTSDGFNSMA  
PFAMQVQARLNYVALQTDVLQENQKILANAFNNAIGNITLALGKVSNAITTTSDGFNTMA  
PFAMQVQARLNYVALQTDVLQENQKILANAFNNAIGNITLALGKVSNAITTTSDGFNTMA  
PFAMQVQARLNYVALQTDVLQENQKILANAFNNAIGNITLALGKVSNAITTTSDGFNTMA  
**PFAMQVQARLNYVALQTDVLQENQKILANAFNNAIGNITLALGKVSNAITTTSDGFNTMA**  
\*:\*\*\*\*\*:\*\*\*\*\*:\*\*\*\*\*:\*\*\*\*\*:\*\*\*\*\*:\*\*\*\*\*:\*\*\*\*\*:\*\*\*\*\*:\*\*\*\*\*:

KP849472.1\_CCoV1\_Italy-23/03  
AY307020.1\_CCoV1\_Elmo/02  
AAB47503\_FCoV1\_KU-2  
KX722530\_FCoV1\_Dutch\_cat2  
KX722529\_FCoV1\_Belgium\_UG-FH8  
KP143512\_FCoV1\_UK26M  
MG893511\_FCoV1\_Germany\_Felix  
KY566209\_FCoV1\_China10  
FJ938054\_FCoV1\_Utrecht\_UU4  
DQ848678\_FCoV1\_C1Je\_Kitten\_FIP  
EU186072\_FCoV1\_Black  
**AB088222\_FCoV1\_UCD1**

SALT KIQSVVNQQGNALSQ L TQQLQNNFQAISSSIAEIYNRLEKVEADAQVDR LITGR L A  
SALT KIQSVVNQQGNALSQ L TQQLQNNFQAISSSIAEIYNRLEKVEADAQVDR LITGR L A  
SALT KIQSVVNQQGEALSQ L TSQLQKNFQAISSSIAEIYNRLEKVEADAQVDR LITGR L A  
LALT KIQSVVNQQGEALSQ L TSQLQKNFQAISSSIAEIYNRLEKVEADAQVDR LITGR L A  
SALT KIQSVVNQQGEALSQ L TSQLQKNFQAISSSIAEIYNRLEKVEADAQVDR LITGR L A  
SALT KIQSVVNQQGEALSQ L TSQLQNNFQAISSSIAEIYNRLEKVEADAQVDR LITGR L A  
SALT KIQSVVNQQGEALSQ L TSQLQKNFQAISSSIAEIYNRLEKVEADAQVDR LITGR L A  
**SALT KIQSVVNQQGEALSQ L TSQLRKNFQAISSSIAEIYNRLEKVEADAQVDR LITGR L A**  
\*\*\*\*\*:\*\*\*\*\*:\*\*\*\*\*:\*\*\*\*\*:\*\*\*\*\*:\*\*\*\*\*:\*\*\*\*\*:\*\*\*\*\*:\*\*\*\*\*:

KP849472.1\_CCoV1\_Italy-23/03  
AY307020.1\_CCoV1\_Elmo/02  
AAB47503\_FCoV1\_KU-2  
KX722530\_FCoV1\_Dutch\_cat2  
KX722529\_FCoV1\_Belgium\_UG-FH8  
KP143512\_FCoV1\_UK26M  
MG893511\_FCoV1\_Germany\_Felix  
KY566209\_FCoV1\_China10  
FJ938054\_FCoV1\_Utrecht\_UU4  
DQ848678\_FCoV1\_C1Je\_Kitten\_FIP  
EU186072\_FCoV1\_Black  
**AB088222\_FCoV1\_UCD1**

ALNAYVAQTLTQYTEVKASRQLAMEKVNCEVKSQSDRYGFCGNGTHLFS LANAAPDGLLF  
ALNAYVAQTLTQYTEVKASRQLAMEKVNCEVKSQSDRYGFCGNGTHLFS LANAAPDGLLF  
ALNAYVSQLTQYAEVKASRQIALEKVNCEVKSQSNRYGFCGNGTHLFS LVNSAPDGLLF  
ALNAYVSQLTQYAEVKASRQLAMEKVNCEVKSQSDRYGFCGNGTHLFS LVNSAPDGLLF  
ALNAYVSQLTQYAEVKASRQLAMEKVNCEVKSQSDRYGFCGNGTHLFS LVNSAPDGLLF  
ALNAYVSQLTQYSEVKASRQLAMEKVNCEVKSQSNRYGFCGNGTHLFS LVNSAPDGLLF  
ALNAYVSQLTQYAEVKASRQLAMEKVNCEVKSQSDRYGFCGNGTHLFS LVNSAPDGLLF  
ALNAYVAQTLTQYAEVKASRQLAMEKVNCEVKSQSDRYGFCGNGTHLFS LVNSAPDGLLF  
ALNAYVAQTLTQYAEVKASRQLAMEKVNCEVKSQSDRYGFCGNGTHLFS LVNSAPDGLLF  
ALNAYVAQTLTQYTEVKASRQLAMEKVNCEVKSQSNRYGFCGNGTHLFS LVNSAPDGLLF  
ALNAYVSQLTQYAEVKASRQLAMEKVNCEVKSQSDRYGFCGNGTHLFS LVNSAPDGLLF  
**ALNAYVSQLTQYAEVKASRQLAMEKVNCEVKSHSDRYGFCGNGTHLFS LVNSAPDGLLF**  
\*\*\*\*\*:\*\*\*\*\*:\*\*\*\*\*:\*\*\*\*\*:\*\*\*\*\*:\*\*\*\*\*:\*\*\*\*\*:\*\*\*\*\*:\*\*\*\*\*:

KP849472.1\_CCoV1\_Italy-23/03  
AY307020.1\_CCoV1\_Elmo/02  
AAB47503\_FCoV1\_KU-2  
KX722530\_FCoV1\_Dutch\_cat2  
KX722529\_FCoV1\_Belgium\_UG-FH8  
KP143512\_FCoV1\_UK26M  
MG893511\_FCoV1\_Germany\_Felix  
KY566209\_FCoV1\_China10  
FJ938054\_FCoV1\_Utrecht\_UU4  
DQ848678\_FCoV1\_C1Je\_Kitten\_FIP  
EU186072\_FCoV1\_Black  
**AB088222\_FCoV1\_UCD1**

LHTVLLPTEWEEVTAWSGICVNDTYAYVLKDFKSSIFS YNGTYMITPRNMFQPRKPQMSD  
LHTVLLPTEWEEVTAWSGICVNDTYAYVLKDFKSSIFS YNGTYMITPRNMFQPRKPQMSD  
FHTVLLPTEWEEVTAWSGICVNDTYAYVLKDFDHSIFS YNGTYMVTPRNMFQPRKPQMSD  
FHTVLLPTEWEEVTAWSGICVNDTYAYVLKDFEYSIFS YNNTYMTVPRNMFQPRKPHMSD  
FHTVLLPTEWEEVTAWSGICVNDTYAYVLKDFEYSIFS YNNTYMTVPRNMFQPRKPQMSD  
FHTVLLPTEWEEVTAWSGICVNDTYAYVLKDFEYSIFS YNGTYMVTPRNMFQPRKPQMSD  
FHTVLLPTEWEEVTAWSGICVNDTYAYVLKDFEYSIFS YNGTYMVTPRNMFQPRKPQMSD  
FHTVLLPTEWEEVTAWSGICVNDTYAYVLKDFEYSIFS YNNTYMTVPRNMFQPRKPQMSD  
FHTVLLPTEWEEVTAWSGICVNDTYAYVLKDFEYSIFS YNNTYMTVPRNMFQPRKPQMSD  
FHTVLLPTEWEEVTAWSGICVNDTYAYVLKDFEYSIFS YNNTYMTVPRNMFQPRKPQMSD  
FHTVLLPTEWEEVTAWSGICVNDTYAYVLKDFEYSIFS YNNTYMTVPRNMFQPRKPQMSD  
FHTVLLPTEWEEVTAWSGICVNDTYAYVLKDFEYSIFS YNNTYMTVPRNMFQPRKPQMSD  
FHTVLLPTEWEEVTAWSGICVNDTYAYVLKDFEYSIFS YNNTYMTVPRNMFQPRKPQMSD  
**FHTVLLPTEWEEVTAWSGICVNDTFAYVLKDFEYFIFS YNNTYMTVPRNMFQPRKPQMSD**  
:\*\*\*\*\*:\*\*\*\*\*:\*\*\*\*\*:\*\*\*\*\*:\*\*\*\*\*:\*\*\*\*\*:\*\*\*\*\*:\*\*\*\*\*:\*\*\*\*\*:

Stem Helix (SH)  
SH Core

KP849472.1\_CCoV1\_Italy-23/03  
 AY307020.1\_CCoV1\_Elmo/02  
 AAB47503\_FCoV1\_KU-2  
 KX722530\_FCoV1\_Dutch\_cat2  
 KX722529\_FCoV1\_Belgium\_UG-FH8  
 KP143512\_FCoV1\_UK26M  
 MG893511\_FCoV1\_Germany\_Felix  
 KY566209\_FCoV1\_China10  
 FJ938054\_FCoV1\_Utrecht\_UU4  
 DQ848678\_FCoV1\_C1Je\_Kitten\_FIP  
 EU186072\_FCoV1\_Black  
 AB088222\_FCoV1\_UCD1

FVQITSCEVTFLNNTTYTTFEEIVIDYIDINKTISDMLEQYSPNFTIPDFTEGLEIFNQTK  
 FVQITSCEVTFLNNTTYTTFEEIVIDYIDINKTISDMLEQYSPNFTIPDFTEGLEIFNQTK  
 FVQITSCEVTFLNMTYTTTFQEIVIDYIDINKTIADMLEQYNPNYTTPELNLLLDIFNQTK  
 FVQITSCEVTFLNNTTYTTFQEIVIDYIDINKTISDMLEQYNPNHTIPDLDLQLEIFNQTK  
 FVRITSCEVTFLYTTYTAFQEIVIDYIDINKTISDMLEQYNPNYTTPELNLQLEIFNQTK  
 FVQITSCEVTFLNNTTYTTFQEIVIDYIDINKTIADMLEQYNPNYTTPELNLQLEIFNQTK  
 FVQITSCEVTFLNNTTYTTFQEIVIDYIDINKTISDMLEQYNPNYTTPELNLQLEIFNQTK  
 FVQITSCEVTFLNNTTYTTFQEIVIDYIDINKTIADMLEQYNPNYTTPELNLQLEIFNQTK  
 FVQITSCEVTFLNNTTYTTFQEIVIDYIDINKTIADMLEQYHSNYTTPELNLQLEIFNQTK  
 FVQITSCEVTFLNNTTYTFQDIVVDYIDINKTIADMLEQYNPNYTTPELNLQLEIFNQTK  
 FVQITSCEVTFLNNTTYTTFQDIVVDYIDINKTIADMLEQYHSNYTTPELNLQLEIFNQTK  
 FVQIMSCEVTFLNNTTYTTFQEIVIDYIDINKTIADMLEQYHSNYTTPELNLQLEIFNQTK  
 \*\*: \* \*\*\*\*\* \*: \* \*: :\*:\*\*\*\*\*:\*\*\*\*\* \*.\* \*: : :\*:\*\*\*\*\*

KP849472.1\_CCoV1\_Italy-23/03  
 AY307020.1\_CCoV1\_Elmo/02  
 AAB47503\_FCoV1\_KU-2  
 KX722530\_FCoV1\_Dutch\_cat2  
 KX722529\_FCoV1\_Belgium\_UG-FH8  
 KP143512\_FCoV1\_UK26M  
 MG893511\_FCoV1\_Germany\_Felix  
 KY566209\_FCoV1\_China10  
 FJ938054\_FCoV1\_Utrecht\_UU4  
 DQ848678\_FCoV1\_C1Je\_Kitten\_FIP  
 EU186072\_FCoV1\_Black  
 AB088222\_FCoV1\_UCD1

LNLTAEIDELQVRADNLTVIAHNLQEYIDNLNKTLDVLEWLNRIETYVKWPWYVWLLIGL  
 LNLTAEIDELQVRADNLTVIAHNLQEYIDNLNKTLDVLEWLNRIETYVKWPWYVWLLIGL  
 LNLTAEIDQLEQRADNLTTIAHELQQYIDNLNKTLDVLDLWLNRIETYVKWPWYVWLLIGL  
 LNLTAEIDQLEQRADNLTTIAHELQQYIDNLNKTLDVLEWLNRIETYVKWPWYVWLLIGL  
 LNLTAEIDQLEERADNLTVIAHELQQYIDNLNKTLDVLEWLNRIETYVKWPWYVWLLIGL  
 LNLTAEIDQLEQRADNLTNIAHQLQQYIDNLNKTLDVLEWLNRIETYVKWPWYVWLLIGL  
 LNLTAEIDQLEQRADNLTTIAHELQQYIDNLNKTLDVLEWLNRIETYVKWPWYVWLLIGL  
 LNLTAEIDQLEQRADNLTTIAHELQQYIDNLNKTLDVLEWLNRIETYVKWPWYVWLLIGL  
 LNLTAEIDQLEQRADNLTNIAHELQQYIDNLNKTLDVLEWLNRIETYVKWPWYVWLLIGL  
 LNLTAEIDQLEQRADNLSTIAHELQQYIDNLNKTLDVLEWLNRIETYVKWPWYVWLLIGL  
 LNFTA EIDQLEQRADNLTTIAHELQQYIDNLNKTLDVLEWLNRIETYVKWPWYVWLLIGL  
 LNLTAEIDQLEQRADNLTNIAHELQEYIDNLNKTLDVLEWLNRIETYVKWPWYVWLLIGL  
 \*:\*\*\*\*\*: \* : \*\*\*\*\*: \* \*:\*\*\*\*\*: \* :\*\*\*\*\*:\*\*\*\*\*:\*\*\*\*\*

KP849472.1\_CCoV1\_Italy-23/03  
 AY307020.1\_CCoV1\_Elmo/02  
 AAB47503\_FCoV1\_KU-2  
 KX722530\_FCoV1\_Dutch\_cat2  
 KX722529\_FCoV1\_Belgium\_UG-FH8  
 KP143512\_FCoV1\_UK26M  
 MG893511\_FCoV1\_Germany\_Felix  
 KY566209\_FCoV1\_China10  
 FJ938054\_FCoV1\_Utrecht\_UU4  
 DQ848678\_FCoV1\_C1Je\_Kitten\_FIP  
 EU186072\_FCoV1\_Black  
 AB088222\_FCoV1\_UCD1

VVIFCIPLLLFCCCGSTGCCGCGFCIGSCCHSMCRRQFESYEPIEKVHIH  
 VVIFCIPLLLFCCCGSTGCCGCGFCIGSCCHSMCRRQFESYEPIEKVHIH  
 VVVFICIPLLLFCCCLSTGFCGCGFCVGSCHSLCRRQFETYEPIEKVHIH  
 VVVFICIPLLLFCCCLSTGCCGCGFCGLGSCCHSLCRRQFESYEPIEKVHIH  
 VVVFICIPLLLFCCCLSTGCCGCGFCGLGSCCHSLCRRQFENYEPIEKVHIH  
 VVVFICIPLLLFCCCLSTGCCGCGFCGLGSCCHSLCRRQFESYEPIEKVHIH  
 VVVFICIPLLLFCCCLSTGCCGCGFCGLGSCCHSLCRRQFESYEPIEKVHIH  
 VVVFICIPLLLFCCCLSTGCCGCGFCGLGSCCHSLCRRQFESYEPIEKVHIH  
 VVVFICIPLLLFCCCLSTGCCGCGFCGLGSCCHSLCRRQFESYEPIEKVHIH  
 VVVFICIPLLLFCCCLSTGCCGCGFCGLGSCCHSLCRRQFESYEPIEKVHIH  
 VVVFICIPLLLFCCCLSTGCCGCGFCGLGSCCHSLCRRQFESYEPIEKVHIH  
 VVVFICIPLLLFCCCLSTGCCGCGFCGLGSCCHSLCRRQFENYEPIEKVHIH  
 VVVFICIPLLLFCCCLSTGCCGCGFCGLGSCCHSLCRRQFENYEPIEKVHIH  
 VVVFICIPLLLFCCCLSTGCCGCGFCGLGSCCHSLCRRQFENYEPIEKVHIH  
 VVVFICIPLLLFCCCLSTGCCGCGFCGLGSCCHSLCRRQFENYEPIEKVHIH

# B

Summary of Amino Acid (AA) Sequence Identity and Similarity between CCoV1 and FCoV1

|                           | NTD          | RBD   | CTD<br>(CCoV1) | CTD<br>(FCoV1) | S1<br>(CCoV1) | S1<br>(FCoV1) | S2<br>(CCoV1) | S2<br>(FCoV1) |
|---------------------------|--------------|-------|----------------|----------------|---------------|---------------|---------------|---------------|
| Total No. of AA           | 435          | 281   | 88             | 86             | 800           | 798           | 675           | 677           |
| No. of AA with Identity   | 150          | 156   | 58             | 58             | 375           | 375           | 496           | 496           |
| No. of AA with Similarity | 253          | 227   | 71             | 71             | 567           | 567           | 603           | 603           |
| % Identity                | 34.5%        | 55.5% | 65.9%          | 67.4%          | 46.9%         | 47.0%         | 73.5%         | 73.3%         |
| % Similarity              | <b>54.2%</b> | 80.8% | 80.7%          | 82.6%          | 70.9%         | 71.0%         | <b>89.3%</b>  | <b>89.1%</b>  |

Figure S10

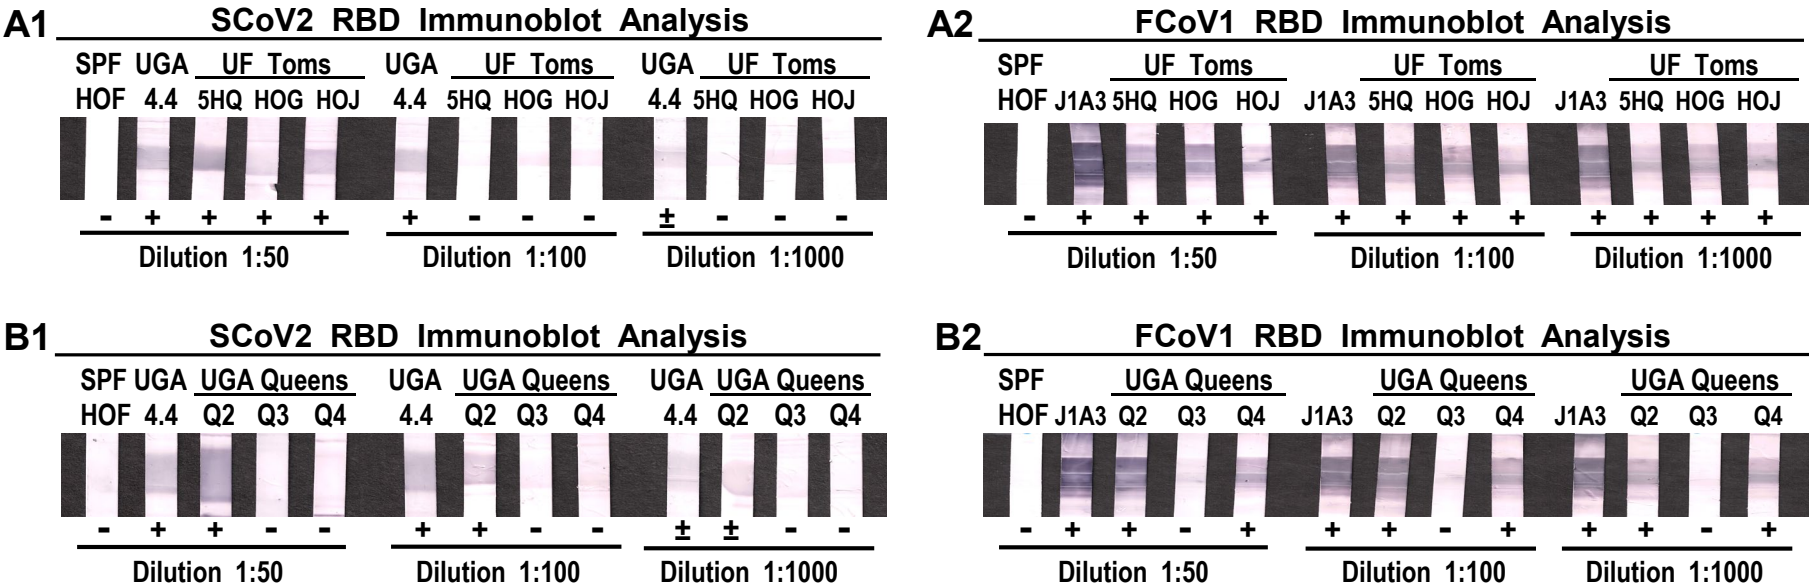

Figure S11

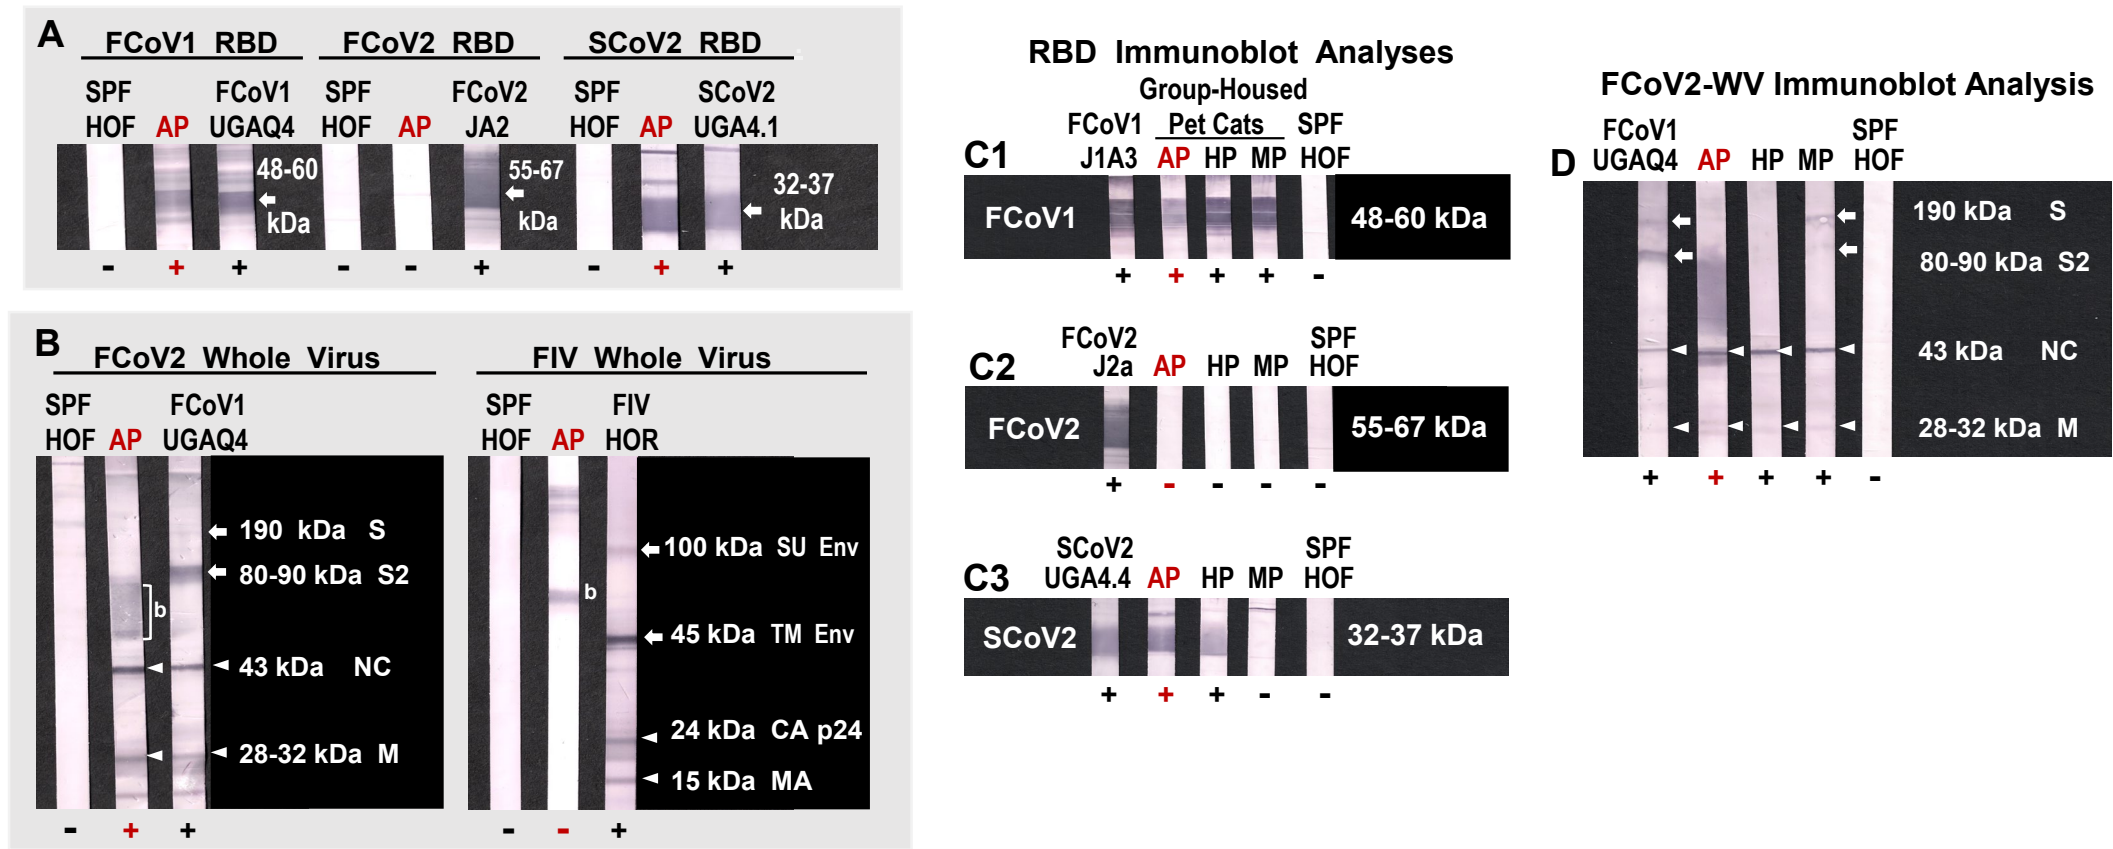

**Table S1.**  
**CD8<sup>+</sup> CTL and CD4<sup>+</sup> T<sub>H</sub> Epitopes on SCoV2 UF-RBD and UF2-RBD \***

| U.S.<br>Population /<br>Race* | HLA-A/B<br>Supertype /<br>DRB1 Lineage | Allele /<br>Allotype * | UF-RBD                                    | UF2-RBD                                   |                               |
|-------------------------------|----------------------------------------|------------------------|-------------------------------------------|-------------------------------------------|-------------------------------|
|                               |                                        |                        | No. of CTL /<br>T <sub>H</sub> Epitope †‡ | No. of CTL /<br>T <sub>H</sub> Epitope †‡ | N/C Extended<br>Seq Epitope § |
| Both                          | A1                                     | A*0101                 | 1                                         | 1                                         | 0                             |
| Caucasian                     | A1                                     | A*3201                 | 3                                         | 3                                         | 0                             |
| Black                         | A1                                     | A*3001                 | 3                                         | <b>5</b>                                  | 1N+1C                         |
| Both                          | A2                                     | A*0201                 | 1                                         | 1                                         | 0                             |
| Caucasian                     | A2                                     | A*0205                 | 2                                         | 2                                         | 0                             |
| Black                         | A2                                     | A*6802                 | 3                                         | 3                                         | 0                             |
| Both                          | A3                                     | A*0301                 | 4                                         | <b>8</b>                                  | 3N+1C                         |
| Caucasian                     | A3                                     | A*1101                 | 5                                         | <b>9</b>                                  | 3N+1C                         |
| Black                         | A3                                     | A*7401                 | 4                                         | <b>6</b>                                  | 2N                            |
| <b>HLA-A Subtotal:</b>        |                                        |                        | 26                                        | 39                                        | 9N+3C                         |
|                               |                                        |                        |                                           |                                           |                               |
| Both                          | B7                                     | B*0702                 | 1                                         | <b>2</b>                                  | 1C                            |
| Caucasian                     | B7                                     | B*5101                 | 1                                         | 1                                         | 0                             |
| Black                         | B7                                     | B*5301                 | 2                                         | 2                                         | 0                             |
| Caucasian                     | B44                                    | B*4402                 | 1                                         | 1                                         | 0                             |
| Caucasian                     | B44                                    | B*4001                 | 2                                         | 2                                         | 0                             |
| Black                         | B44                                    | B*4501                 | 1                                         | <b>2</b>                                  | 1N                            |
| Both                          | B44                                    | B*4403                 | 1                                         | 1                                         | 0                             |
| Caucasian                     | B27                                    | B*2705                 | 3                                         | <b>4</b>                                  | 1N                            |
| Both                          | B27                                    | B*1402                 | 4                                         | <b>5</b>                                  | 1N                            |
| Black                         | B27                                    | B*1503                 | 5                                         | 5                                         | 0                             |
| Caucasian                     | B27                                    | B*3901                 | 2                                         | <b>3</b>                                  | 1N                            |
| <b>HLA-B Subtotal:</b>        |                                        |                        | 23                                        | 28                                        | 4N+1C                         |
| <b>HLA-A+HLA-B Total:</b>     |                                        |                        | 49                                        | 67                                        | 13N+4C                        |
|                               |                                        |                        |                                           |                                           |                               |
| Both                          | DRB1*04                                | 0401                   | 0                                         | 0                                         | 0                             |
| Caucasian                     | DRB1*04                                | 0404                   | 0                                         | 0                                         | 0                             |
| Caucasian                     | DRB1*04                                | 0402                   | 1                                         | 1                                         | 0                             |
| Black                         | DRB1*04                                | 0405                   | 7                                         | 7                                         | 0                             |
| Both                          | DRB1*15                                | 1501                   | 4                                         | 4                                         | 0                             |
| Both                          | DRB1*07                                | 0701                   | 1                                         | 1                                         | 0                             |
| Both                          | DRB1*03                                | 0301                   | 0                                         | 0                                         | 0                             |
| Both                          | DRB1*13                                | 1301                   | 6                                         | 6                                         | 0                             |
| Both                          | DRB1*13                                | 1302                   | 0                                         | 0                                         | 0                             |
| Both                          | DRB1*01                                | 0101                   | 7                                         | 7                                         | 0                             |
| Caucasian                     | DRB1*01                                | 0103                   | 0                                         | 0                                         | 0                             |
| Both                          | DRB1*11                                | 1101                   | 13                                        | 13                                        | 0                             |
| Both                          | DRB1*08                                | 0801                   | 6                                         | 6                                         | 0                             |
| <b>HLA-DRB1 Total:</b>        |                                        |                        | 45                                        | 45                                        | 0                             |

\* Top 2-3 alleles or allotypes for U.S. Caucasian and Black populations according to the survey in the Allele Frequencies in Worldwide Populations database: <http://www.allele-frequencies.net/hla6006a.asp>  
Each individual has two HLA-A alleles, two HLA-B alleles, and two HLA-DRB1 alleles. The person will be protected the most if he/she has HLA-A and HLA-B alleles that can express allotypes which recognize many CD8<sup>+</sup> T-cell (cytotoxic T lymphocyte, CTL) epitopes.

† CD8<sup>+</sup> T-cell/CTL epitopes derived from NetMHCpan 4.1 server using 9mer peptide as the core.

<https://services.healthtech.dtu.dk/service.php?NetMHCpan-4.1>

CD4<sup>+</sup> T-cell (T-helper, T<sub>H</sub>) epitopes derived from NetMHCII 2.3 server using 15mer peptide as the core.

<https://services.healthtech.dtu.dk/service.php?NetMHCII-2.3>

‡ These epitopes are not conserved epitopes and therefore are susceptible to mutation(s).

§ The number of T-cell epitope(s) present or overlapping with the extended 46-aa sequence (Seq) of the UF2-RBD at the amino-end (N) and with the extended 12-aa sequence at the carboxyl-end (C).
